# Supplementary material for: Epidemiology of anal human papillomavirus infection and high-grade squamous intraepithelial lesions in 29 900 men according to HIV status, sexuality, and age: a collaborative pooled analysis of 64 studies
Source: PubMed Central journal article supplement — Lancet HIV. 2021 Jul 30;8(9):e531–43. doi: 10.1016/S2352-3018(21)00108-9 (PMC8408042; doi:10.1016/s2352-3018(21)00108-9), 2021-07-30
Supplement: mmc1.pdf [file mmc1.pdf]

# THE LANCET HIV

## Supplementary appendix

This appendix formed part of the original submission and has been peer reviewed. We post it as supplied by the authors.

Supplement to: Wei F, Gaisa MM, D'Souza G, et al. Epidemiology of anal human papillomavirus infection and high-grade squamous intraepithelial lesions in 29 900 men according to HIV status, sexuality, and age: a collaborative pooled analysis of 64 studies. *Lancet HIV* 2021; published online July 30. [http://dx.doi.org/10.1016/S2352-3018\(21\)00108-9](http://dx.doi.org/10.1016/S2352-3018(21)00108-9).

## Supplementary appendix

### Table of Contents

|                                                                                                                                                                                                                                                          |           |
|----------------------------------------------------------------------------------------------------------------------------------------------------------------------------------------------------------------------------------------------------------|-----------|
| <b><i>Search strategy</i></b> .....                                                                                                                                                                                                                      | <b>2</b>  |
| <b><i>Acknowledgements</i></b> .....                                                                                                                                                                                                                     | <b>3</b>  |
| <b><i>Appendix Tables</i></b> .....                                                                                                                                                                                                                      | <b>4</b>  |
| <b>Appendix Table 1:</b> Characteristics of 64 included studies.....                                                                                                                                                                                     | <b>4</b>  |
| <b>Appendix Table 2:</b> Prevalence of anal HSIL+ in studies that performed HRA in all participants and enrolled both HIV-positive and HIV-negative MSM. ....                                                                                            | <b>7</b>  |
| <b>Appendix Table 3:</b> Prevalence of anal histological HSIL+ in studies that performed HRA in all participants and enrolled both HIV-positive and HIV-negative MSM.....                                                                                | <b>8</b>  |
| <b><i>Appendix Figures</i></b> .....                                                                                                                                                                                                                     | <b>9</b>  |
| <b>Appendix Figure 1:</b> Age-specific prevalence of individual non-16 HR-HPV infection in four male risk groups.....                                                                                                                                    | <b>9</b>  |
| <b>Appendix Figure 2:</b> Age-specific prevalence of A) 2v-HPV, B) 4v-HPV, and C) 9v-HPV infection in four male risk groups. ....                                                                                                                        | <b>15</b> |
| <b>Appendix Figure 3:</b> Overall and age-specific distribution of number of HR-HPV infections in four male risk groups. ....                                                                                                                            | <b>18</b> |
| <b>Appendix Figure 4:</b> Prevalence of A) HPV16 and B) HR-HPV infection in four male risk groups with or without cytopathological data. ....                                                                                                            | <b>19</b> |
| <b>Appendix Figure 5:</b> Prevalence of anal HPV infection in men with or without cytopathological data by age group: A) HPV16 in HIV-positive MSM, B) HR-HPV in HIV-positive MSM, C) HPV16 in HIV-negative MSM, and D) HR-HPV in HIV-negative MSM. .... | <b>20</b> |
| <b>Appendix Figure 6:</b> Prevalence of anal histological HSIL+ in studies that performed HRA in all participants. ....                                                                                                                                  | <b>21</b> |
| <b>Appendix Figure 7:</b> Prevalence of anal HPV16 and anal HSIL+ in HIV-positive MSM, according to current CD4+ cell count, stratified by age group.....                                                                                                | <b>22</b> |
| <b>Appendix Figure 8:</b> Prevalence of anal HPV16 in HIV-positive MSM, according to current CD4+ cell count, nadir CD4+ cell count, and HIV viral load. ....                                                                                            | <b>23</b> |
| <b><i>References</i></b> .....                                                                                                                                                                                                                           | <b>24</b> |

## **Search strategy**

### **MEDLINE**

("papillomaviridae"[All Fields] OR "papillomavirus"[All Fields] OR "HPV"[All Fields]) AND (("anal"[All Fields] AND "canal"[All Fields]) OR "anal canal"[All Fields] OR "anus"[All Fields] OR "anal"[All Fields])

### **EMBASE**

('papillomaviridae':ta,ab,kw,ti OR 'papillomavirus':ta,ab,kw,ti OR 'hpv':ta,ab,kw,ti OR 'human papillomavirus':ta,ab,kw,ti) AND ('anal':ta,ab,kw,ti AND 'canal':ta,ab,kw,ti OR 'anal':ta,ab,kw,ti OR 'canal':ta,ab,kw,ti OR 'anus':ta,ab,kw,ti OR 'anal canal':ta,ab,kw,ti) AND ([article]/lim OR [article in press]/lim OR [review]/lim) AND [humans]/lim AND [embase]/lim

### **Cochrane**

("papillomaviridae" or "papillomavirus" or "HPV" or "human papillomavirus") and (("anal" and "canal") or ("anal" or "canal") or "anal" or "anus" or "anal canal")

## Acknowledgements

The authors thank Chunqing Lin and Elske Marra for previous work on literature selection, Damien Georges and Vanessa Tenet for their help on data analysis, Susan Gamon for her help on text editing, and the other colleagues involved in original studies: Todd Brown, Joseph Margolick, Stephen Gange, Elizabeth Golub, Steven Wolinsky, Roger Detels, Matthew Mimiaga, Jeremy Martinson and Charles Rinaldo (D'Souza et al, part of data in this manuscript were collected by MACS and WIHS, now the MACS/WIHS Combined Cohort Study (MWCCS), which is supported by the National Institutes of Health. Acknowledgement: <https://statepi.jhsph.edu/mwccs/acknowledgements/>; and part of MACS data is funded by NIH/NCI R01CA169508); Ting Wu, Jun Zhang, Shoujie Huang and Yingying Su (Xia et al); Nancy B. Kiviat, Cathy W. Critchlow and Julia E. Hood (Hawes et al); Maria Benevolo, Amalia Giglio, Massimo Giuliani, Alessandra Latini, Francesca Rollo (Donà et al, COROH study); María Fontillón, Yusnelkis Milanés Guisado, Luis F. López-Cortés, César Sotomayor and Pompeyo Viciano (Neukam et al, SeVIHanal Study); Lauri Markowitz (Meites et al, YMHPV study); Andrew Grulich and Fengyi Jin (Poynten et al, SPANC study); Cédric Arvieux, Frédérique Le Breton, Ana Canestri, Valérie Costes, Jean-Michel Didelot, Tristan Ferry, Jean-Francois Fléjou, Isabelle Heard, Sébastien Henno, Nadia Hoyeau, Héléne Laude, Anne-Carole Lesage, Gilles Maincent, Lucie Marchand, Haingo Njatonirina, Ventzislava Petrov-Sanchez, Lionel Piroth, Isabelle Poizot-Martin, Sylvie Radenne, Emmanuelle Ressiot, Jacques Reynes, Laurent Siproudhis, Olivia Zaegel-Faucher and the CNR HPV - Institut Pasteur (Combes et al, APACHES study); Lucía S Tamayo, Daniela Herrera and Gloria I Sánchez (Posada et al); Joel Palefsky (Hernandez et al); Antonio Ocampo Hermida and Silvia Rodríguez Rivero (Iribarren Díaz et al); Kayo Fujimoto (Nyitray et al); Richard Muwonge (Smelov et al); Joel Palefsky and Teresa Darragh (Nowak et al); Stephen J Kerr (Phanuphak et al); Han-zhu Qian and Sten H Vermund (Hu et al); Sinead Delany-Moretlwe (Chikandiwa et al); Anapong Chitwarakorn, Anchalee Varangrat, Eileen F Dunne, Timothy H Holtz, Wannee Chonwattana, Ross D Cranston and Ian McGowan (Hickey et al); Athanase Munyaneza, Gallican Kubwimana, Benjamin Muhoza, Faustin Kanyabwisha, Patrick Tuyisenge, Jean Paul Mivumbi, Josephine Gasana, Adebola Adedimeji, Leon Mutesa, Philip Castle, Kathryn Anastos and Joel Palefsky (Murenzi et al); David Veyer, Laurence Weiss, Simon Pernot and Juliette Pavie (Péré et al); Carla Henere (del Pino et al); Savas Tsikis, Lea Hoefler, George Bethimoutis, Electra Nicolaidou, Vassilios Paparizos, Christina Antoniou, Leonidas Chardaliasc, Georgios-Emmanouil Stavropoulosc, Shruti Sharma, Bradley C. Long, Ibro Mujacic, Sabah Kadri, Jeremy P Segal, Larissa V Furtado and John Schneider (Charnot-Katsikas et al).

## Appendix Tables

**Appendix Table 1: Characteristics of 64 included studies.**

| Study                                    | Country       | No. of men with anal HPV16 data |             |             |            | No. of men with cytology data | No. of men with current CD4 data | No. of men with nadir CD4 data | No. of men with HIV viral load data |             |
|------------------------------------------|---------------|---------------------------------|-------------|-------------|------------|-------------------------------|----------------------------------|--------------------------------|-------------------------------------|-------------|
|                                          |               | Overall                         | HIV+MSM     | HIV-MSM     | HIV+MSW    |                               |                                  |                                |                                     | HIV-MSW     |
| <b>North America</b>                     |               | <b>9877</b>                     | <b>5221</b> | <b>3667</b> | <b>38</b>  | <b>951</b>                    | <b>5956</b>                      | <b>4014</b>                    | <b>1313</b>                         | <b>3862</b> |
| D'Souza et al (2016) <sup>1</sup>        | USA           | 1403                            | 658         | 723         | 9          | 13                            | ✓                                | ✓                              | ✓                                   | ✓           |
| Gaisa et al (2021) <sup>2</sup>          | USA           | 1368                            | 1368        | 0           | 0          | 0                             | ✓                                | ✓                              |                                     | ✓           |
| Chin-Hong et al (2004) <sup>3*</sup>     | USA           | 1120                            | 0           | 1120        | 0          | 0                             |                                  |                                |                                     |             |
| Meites et al (2016) <sup>4†‡</sup>       | USA           | 919                             | 121         | 798         | 0          | 0                             |                                  |                                |                                     |             |
| Critchlow et al (1998) <sup>5</sup>      | USA           | 853                             | 451         | 402         | 0          | 0                             | ✓                                | ✓                              |                                     | ✓           |
| Sambursky et al (2018) <sup>6</sup>      | USA           | 571                             | 306         | 250         | 5          | 10                            | ✓                                | ✓                              |                                     | ✓           |
| Sudenga et al (2017) <sup>7</sup>        | USA           | 540                             | 1           | 56          | 0          | 483                           |                                  |                                |                                     |             |
| Wilkin et al (2018) <sup>8</sup>         | USA           | 463                             | 463         | 0           | 0          | 0                             | ✓                                | ✓                              | ✓                                   | ✓           |
| Nyitray et al (2008) <sup>9</sup>        | USA           | 440                             | 0           | 0           | 1          | 439                           |                                  |                                |                                     |             |
| Choi et al (2021) <sup>10†</sup>         | Canada        | 426                             | 283         | 143         | 0          | 0                             |                                  |                                |                                     |             |
| Clarke et al (2018) <sup>11</sup>        | USA           | 341                             | 341         | 0           | 0          | 0                             | ✓                                |                                |                                     |             |
| Hood et al (2016) <sup>12</sup>          | USA           | 335                             | 333         | 0           | 2          | 0                             | ✓                                | ✓                              |                                     | ✓           |
| Hernandez et al (2013) <sup>13</sup>     | USA           | 311                             | 311         | 0           | 0          | 0                             | ✓                                | ✓                              |                                     | ✓           |
| de Pokomandy et al (2009) <sup>14</sup>  | Canada        | 241                             | 241         | 0           | 0          | 0                             | ✓                                | ✓                              | ✓                                   | ✓           |
| Lowe et al (2012) <sup>15</sup>          | USA           | 215                             | 120         | 95          | 0          | 0                             | ✓                                |                                |                                     |             |
| Medina-Laabes et al (2018) <sup>16</sup> | USA           | 196                             | 149         | 20          | 21         | 6                             | ✓                                |                                |                                     |             |
| Nyitray et al (2017) <sup>17†</sup>      | USA           | 135                             | 75          | 60          | 0          | 0                             |                                  |                                |                                     | ✓           |
| <b>Asia</b>                              |               | <b>8028</b>                     | <b>2096</b> | <b>3211</b> | <b>242</b> | <b>2479</b>                   | <b>1308</b>                      | <b>1147</b>                    | <b>372</b>                          | <b>883</b>  |
| Wei et al (2018) <sup>18§</sup>          | China         | 1979                            | 0           | 0           | 0          | 1979                          |                                  |                                |                                     |             |
| Tian et al (2017) <sup>19</sup>          | China         | 812                             | 29          | 783         | 0          | 0                             |                                  |                                |                                     |             |
| Li et al (2016) <sup>20</sup>            | China         | 786                             | 100         | 677         | 1          | 8                             |                                  |                                |                                     |             |
| Gao et al (2010) <sup>21</sup>           | China         | 563                             | 49          | 499         | 1          | 14                            |                                  |                                |                                     |             |
| Cheng et al (2015) <sup>22†</sup>        | China, Taiwan | 558                             | 467         | 0           | 91         | 0                             | ✓                                | ✓                              |                                     | ✓           |
| Hu et al (2013) <sup>23</sup>            | China         | 423                             | 170         | 246         | 1          | 6                             |                                  |                                |                                     |             |

| Study                                      | Country                       | No. of men with anal HPV16 data |             |             |           | No. of men with cytology data | No. of men with current CD4 data | No. of men with nadir CD4 data | No. of men with HIV viral load data |             |
|--------------------------------------------|-------------------------------|---------------------------------|-------------|-------------|-----------|-------------------------------|----------------------------------|--------------------------------|-------------------------------------|-------------|
|                                            |                               | Overall                         | HIV+MSM     | HIV-MSM     | HIV+MSW   |                               |                                  |                                |                                     | HIV-MSW     |
| Cranston et al (2015) <sup>24</sup>        | Thailand                      | 386                             | 192         | 191         | 0         | 3                             |                                  | ✓                              | ✓                                   |             |
| Khoo et al (2021) <sup>25† §</sup>         | Malaysia                      | 349                             | 0           | 25          | 0         | 324                           |                                  |                                |                                     |             |
| Wang et al (2019) <sup>26†</sup>           | China, Taiwan                 | 319                             | 103         | 134         | 8         | 74                            | ✓                                |                                |                                     |             |
| Hernandez et al (2016) <sup>27</sup>       | India                         | 266                             | 266         | 0           | 0         | 0                             |                                  | ✓                              | ✓                                   |             |
| Liu et al (2019) <sup>28</sup>             | China                         | 257                             | 80          | 69          | 72        | 36                            |                                  | ✓                              |                                     |             |
| Strong et al (2020) <sup>29</sup>          | China, Taiwan                 | 249                             | 10          | 239         | 0         | 0                             |                                  |                                |                                     |             |
| Phanuphak et al (2013) <sup>30</sup>       | Thailand                      | 243                             | 120         | 123         | 0         | 0                             | ✓                                | ✓                              | ✓                                   |             |
| Yuniastuti et al (2020) <sup>31</sup>      | Indonesia, Malaysia, Thailand | 236                             | 143         | 93          | 0         | 0                             |                                  | ✓                              | ✓                                   |             |
| Li et al (2015) <sup>32</sup>              | China                         | 191                             | 191         | 0           | 0         | 0                             |                                  |                                |                                     |             |
| Ruanpeng et al (2016) <sup>33‡</sup>       | Thailand                      | 168                             | 48          | 120         | 0         | 0                             | ✓                                |                                |                                     |             |
| Wittawatmongkol et al (2019) <sup>34</sup> | Thailand                      | 95                              | 5           | 12          | 43        | 35                            |                                  | ✓                              | ✓                                   |             |
| Yang et al (2012) <sup>35</sup>            | China                         | 87                              | 87          | 0           | 0         | 0                             |                                  |                                |                                     |             |
| Leng et al (2017) <sup>36</sup>            | Malaysia                      | 61                              | 36          | 0           | 25        | 0                             | ✓                                | ✓                              |                                     |             |
| <b>Europe</b>                              |                               | <b>7524</b>                     | <b>4868</b> | <b>1815</b> | <b>64</b> | <b>777</b>                    | <b>4548</b>                      | <b>4059</b>                    | <b>3296</b>                         | <b>3985</b> |
| van Aar et al (2013) <sup>37</sup>         | Netherlands                   | 1044                            | 331         | 713         | 0         | 0                             |                                  | ✓                              | ✓                                   | ✓           |
| Dona et al (2014) <sup>38</sup>            | Italy                         | 881                             | 359         | 522         | 0         | 0                             | ✓                                | ✓                              | ✓                                   | ✓           |
| Viciana et al (2019) <sup>39</sup>         | Spain                         | 641                             | 610         | 0           | 31        | 0                             | ✓                                | ✓                              | ✓                                   | ✓           |
| Torres et al (2013) <sup>40*</sup>         | Spain                         | 568                             | 568         | 0           | 0         | 0                             |                                  |                                |                                     |             |
| Combes et al (2018) <sup>41</sup>          | France                        | 513                             | 513         | 0           | 0         | 0                             | ✓                                | ✓                              | ✓                                   | ✓           |
| Fuchs et al (2016) <sup>42</sup>           | Germany                       | 485                             | 485         | 0           | 0         | 0                             | ✓                                | ✓                              |                                     | ✓           |
| Smelov et al (2018) <sup>43</sup>          | Russia                        | 484                             | 0           | 23          | 1         | 460                           |                                  |                                |                                     |             |
| Burgos et al (2015) <sup>44</sup>          | Spain                         | 473                             | 473         | 0           | 0         | 0                             | ✓                                | ✓                              | ✓                                   | ✓           |
| Iribarren Diaz et al (2017) <sup>45</sup>  | Spain                         | 431                             | 364         | 34          | 20        | 13                            | ✓                                | ✓                              | ✓                                   | ✓           |
| Woostenberg et al (2020) <sup>46†</sup>    | Netherlands                   | 415                             | 18          | 397         | 0         | 0                             |                                  |                                |                                     |             |
| Hidalgo-Tenorio et al (2019) <sup>47</sup> | Spain                         | 393                             | 393         | 0           | 0         | 0                             | ✓                                | ✓                              | ✓                                   | ✓           |
| Schofield et al (2016) <sup>48</sup>       | UK                            | 283                             | 202         | 81          | 0         | 0                             | ✓                                | ✓                              |                                     | ✓           |

| Study                                      | Country                  | No. of men with anal HPV16 data |               |               |            | No. of men with cytology data | No. of men with current CD4 data | No. of men with nadir CD4 data | No. of men with HIV viral load data |             |
|--------------------------------------------|--------------------------|---------------------------------|---------------|---------------|------------|-------------------------------|----------------------------------|--------------------------------|-------------------------------------|-------------|
|                                            |                          | Overall                         | HIV+MSM       | HIV-MSM       | HIV+MSW    |                               |                                  |                                |                                     | HIV-MSW     |
| Tsikis et al (2018) <sup>49</sup>          | Greece                   | 272                             | 47            | 37            | 11         | 177                           |                                  |                                |                                     |             |
| Pernot et al (2018) <sup>50</sup>          | France                   | 227                             | 227           | 0             | 0          | 0                             | ✓                                | ✓                              | ✓                                   |             |
| Del Pino et al (2019) <sup>51</sup>        | Spain                    | 198                             | 198           | 0             | 0          | 0                             | ✓                                | ✓                              | ✓                                   |             |
| Etiennay et al (2012) <sup>52</sup>        | France                   | 142                             | 6             | 8             | 1          | 127                           | ✓                                |                                |                                     |             |
| Damay et al (2010) <sup>53</sup>           | France                   | 74                              | 74            | 0             | 0          | 0                             | ✓                                | ✓                              | ✓                                   |             |
| <b>Latin America</b>                       |                          | <b>1663</b>                     | <b>389</b>    | <b>272</b>    | <b>22</b>  | <b>980</b>                    | <b>376</b>                       | <b>283</b>                     | <b>7</b>                            | <b>296</b>  |
| Sudenga et al (2017) <sup>7</sup>          | Brazil, Mexico           | 1258                            | 6             | 272           | 0          | 980                           |                                  |                                |                                     |             |
| Posada et al (2020) <sup>54</sup>          | Colombia                 | 397                             | 375           | 0             | 22         | 0                             | ✓                                | ✓                              | ✓                                   |             |
| Wilkin et al (2018) <sup>8</sup>           | Brazil                   | 8                               | 8             | 0             | 0          | 0                             | ✓                                | ✓                              | ✓                                   |             |
| <b>Oceania</b>                             |                          | <b>1547</b>                     | <b>470</b>    | <b>1073</b>   | <b>1</b>   | <b>3</b>                      | <b>580</b>                       | <b>421</b>                     | <b>376</b>                          | <b>426</b>  |
| Machalek et al (2016) <sup>55</sup>        | Australia                | 608                             | 214           | 390           | 1          | 3                             | ✓                                | ✓                              | ✓                                   |             |
| Chow et al (2019) <sup>56</sup>            | Australia                | 496                             | 12            | 484           | 0          | 0                             |                                  | ✓                              | ✓                                   |             |
| Ong et al (2019) <sup>57</sup>             | Australia                | 244                             | 244           | 0             | 0          | 0                             |                                  | ✓                              | ✓                                   |             |
| Zou et al (2014) <sup>58</sup>             | Australia                | 199                             | 0             | 199           | 0          | 0                             |                                  |                                |                                     |             |
| <b>Africa</b>                              |                          | <b>1261</b>                     | <b>367</b>    | <b>579</b>    | <b>315</b> | <b>0</b>                      | <b>485</b>                       | <b>536</b>                     | <b>225</b>                          | <b>449</b>  |
| Nowak et al (2020) <sup>59</sup>           | Nigeria                  | 342                             | 204           | 138           | 0          | 0                             | ✓                                | ✓                              | ✓                                   |             |
| Murenzi et al (2020) <sup>60</sup>         | Rwanda                   | 342                             | 67            | 275           | 0          | 0                             |                                  |                                |                                     |             |
| Chikandiwa et al (2017) <sup>61</sup>      | South Africa             | 280                             | 12            | 0             | 268        | 0                             | ✓                                | ✓                              | ✓                                   |             |
| Ferre et al (2019) <sup>62</sup>           | Togo                     | 207                             | 54            | 153           | 0          | 0                             |                                  |                                |                                     |             |
| Chinyowa et al (2018) <sup>63</sup>        | Zimbabwe                 | 48                              | 1             | 0             | 47         | 0                             |                                  | ✓                              | ✓                                   |             |
| Mboumba Bouassa et al (2018) <sup>64</sup> | Central African Republic | 42                              | 29            | 13            | 0          | 0                             |                                  | ✓                              |                                     |             |
| <b>Total</b>                               |                          | <b>29 900</b>                   | <b>13 411</b> | <b>10 617</b> | <b>682</b> | <b>5190</b>                   | <b>13 253</b>                    | <b>10 460</b>                  | <b>5589</b>                         | <b>9901</b> |

HIV+=HIV-positive. HIV-=HIV-negative. MSM=men who have sex with men. MSW=men who have sex with women. Ticks (✓) indicate these studies collected and shared the corresponding data with us. \*Relative data were extracted from the original papers by age group. †All or part of men in these studies self-collected anal samples. ‡These studies enrolled a fraction of transgender women. §These studies were deemed to be the population-based studies for which men were assumed to be HIV-negative, even in the absence of such information at an individual level.

**Appendix Table 2: Prevalence of anal HSIL+ in studies that performed HRA in all participants and enrolled both HIV-positive and HIV-negative MSM.**

|                          | Anal HSIL+ in all MSM (N=2004) |                               | HPV16-positive anal HSIL+* in all MSM (N=2004) |                               | Anal HSIL+ in HPV16-positive MSM (N=460) |                  |
|--------------------------|--------------------------------|-------------------------------|------------------------------------------------|-------------------------------|------------------------------------------|------------------|
|                          | n/N (%)                        | aPR (95% CI)                  | n/N (%)                                        | aPR (95% CI)                  | n/N (%)                                  | aPR (95% CI)     |
| <b>Age group, years</b>  |                                |                               |                                                |                               |                                          |                  |
| 15–24                    | 32/214 (15.0%)                 | 1.19 (0.84–1.69)              | 10/214 (4.7%)                                  | 1.20 (0.58–2.47)              | 10/47 (21.3%)                            | 1.30 (0.73–2.29) |
| 25–34                    | 67/377 (17.8%)                 | Ref.                          | 21/377 (5.6%)                                  | Ref.                          | 21/77 (27.3%)                            | Ref.             |
| 35–44                    | 157/443 (35.4%)                | 1.15 (0.89–1.48)              | 71/443 (16.0%)                                 | 1.46 (0.89–2.42)              | 71/120 (59.2%)                           | 1.35 (0.90–2.03) |
| 45–54                    | 172/495 (34.7%)                | 1.04 (0.81–1.34)              | 82/495 (16.6%)                                 | 1.45 (0.87–2.39)              | 82/129 (63.6%)                           | 1.38 (0.92–2.08) |
| ≥55                      | 134/475 (28.2%)                | 1.03 (0.78–1.34)              | 59/475 (12.4%)                                 | 1.40 (0.83–2.38)              | 59/87 (67.8%)                            | 1.53 (0.99–2.34) |
| <b>Age, per 10 years</b> |                                | 0.97 (0.91–1.03)              |                                                | 1.00 (0.90–1.12)              |                                          | 1.06 (0.99–1.15) |
| <b>HIV status</b>        |                                |                               |                                                |                               |                                          |                  |
| Negative                 | 233/960 (24.3%)                | Ref.                          | 104/960 (10.8%)                                | Ref.                          | 104/193 (53.9%)                          | Ref.             |
| Positive                 | 329/1044 (31.5%)               | 1.44 (1.25–1.65) <sup>†</sup> | 139/1044 (13.3%)                               | 1.41 (1.11–1.80) <sup>†</sup> | 139/267 (52.1%)                          | 1.14 (0.97–1.34) |

PRs were adjusted for study, age group, and HIV status, as appropriate. HSIL+=high-grade squamous intraepithelial lesions and worse. HPV=human papillomavirus. MSM=men who have sex with men. aPR=adjusted prevalence ratio. \*Only includes participants with HSIL+ plus HPV16-positive swabs. <sup>†</sup>Significant aPRs relative to the reference group.



**Appendix Table 3: Prevalence of anal histological HSIL+ in studies that performed HRA in all participants and enrolled both HIV-positive and HIV-negative MSM.**

|                          | Anal HSIL+ in all MSM (N=2004) |                   | HPV16-positive anal HSIL+* in all MSM (N=2004) |                   | Anal HSIL+ in HPV16-positive MSM (N=460) |                   |
|--------------------------|--------------------------------|-------------------|------------------------------------------------|-------------------|------------------------------------------|-------------------|
|                          | n/N (%)                        | aPR (95% CI)      | n/N (%)                                        | aPR (95% CI)      | n/N (%)                                  | aPR (95% CI)      |
| <b>Age group, years</b>  |                                |                   |                                                |                   |                                          |                   |
| 15–24                    | 30/214 (14.0%)                 | 1.17 (0.82–1.67)  | 8/214 (3.7%)                                   | 1.01 (0.46–2.22)  | 8/47 (17.0%)                             | 1.17 (0.61–2.24)  |
| 25–34                    | 67/377 (17.8%)                 | Ref.              | 21/377 (5.6%)                                  | Ref.              | 21/77 (27.3%)                            | Ref.              |
| 35–44                    | 122/443 (27.5%)                | 1.03 (0.80–1.34)  | 60/443 (13.5%)                                 | 1.37 (0.82–2.28)  | 60/120 (50.0%)                           | 1.27 (0.86–1.87)  |
| 45–54                    | 142/495 (28.7%)                | 0.97 (0.75–1.26)  | 67/495 (13.5%)                                 | 1.30 (0.78–2.16)  | 67/129 (51.9%)                           | 1.27 (0.85–1.91)  |
| ≥55                      | 114/475 (24.0%)                | 0.98 (0.74–1.29)  | 53/475 (11.2%)                                 | 1.40 (0.81–2.38)  | 53/87 (60.9%)                            | 1.54 (1.01–2.34)† |
| <b>Age, per 10 years</b> |                                | 0.98 (0.91–1.05)  |                                                | 1.03 (0.92–1.16)  |                                          | 1.11 (1.01–1.22)† |
| <b>HIV status</b>        |                                |                   |                                                |                   |                                          |                   |
| Negative                 | 170/960 (17.7%)                | Ref.              | 81/960 (8.4%)                                  | Ref.              | 81/193 (42.0%)                           | Ref.              |
| Positive                 | 305/1044 (29.2%)               | 1.75 (1.48–2.06)† | 128/1044 (12.3%)                               | 1.59 (1.22–2.09)† | 128/267 (47.9%)                          | 1.26 (1.02–1.55)† |

PRs were adjusted for study, age group, and HIV status, as appropriate. HSIL+=high-grade squamous intraepithelial lesions and worse. HPV=human papillomavirus. MSM=men who have sex with men. aPR=adjusted prevalence ratio. \*Only includes participants with HSIL+ plus HPV16-positive swabs. †Significant aPRs relative to the reference group.

## Appendix Figures

**Appendix Figure 1: Age-specific prevalence of individual non-16 HR-HPV infection in four male risk groups.** Error bars show 95% CIs. PRs were adjusted for study. HPV=human papillomavirus. HIV+=HIV positive. HIV-=HIV negative. MSM=men who have sex with men. MSW=men who have sex with women. aPR=adjusted prevalence ratio. Significant aPRs relative to the reference group are shown in bold.

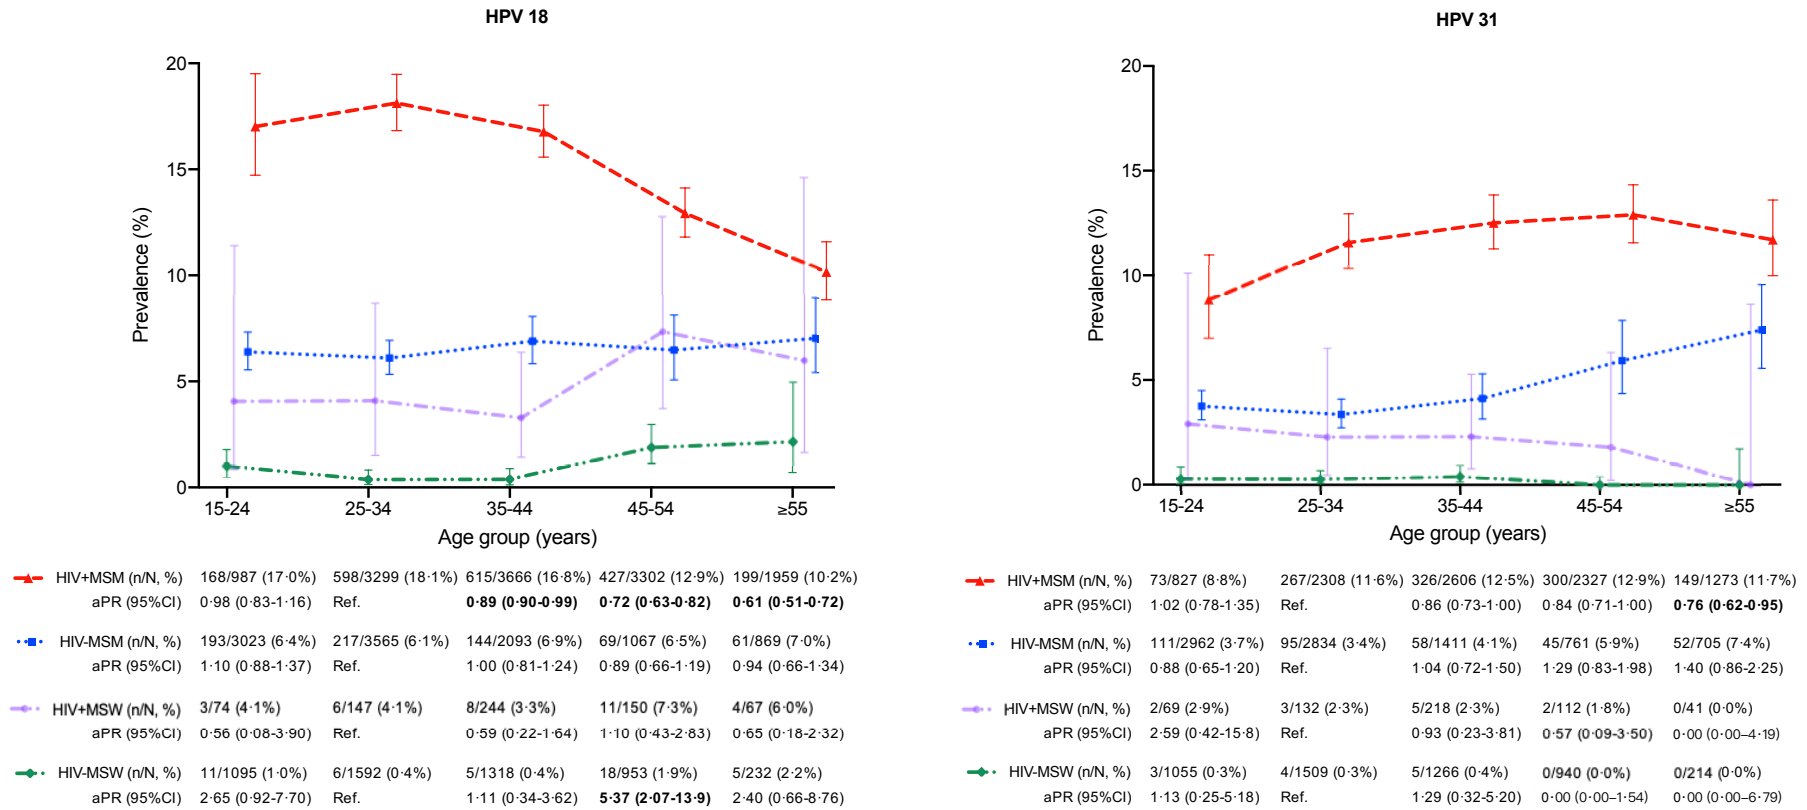

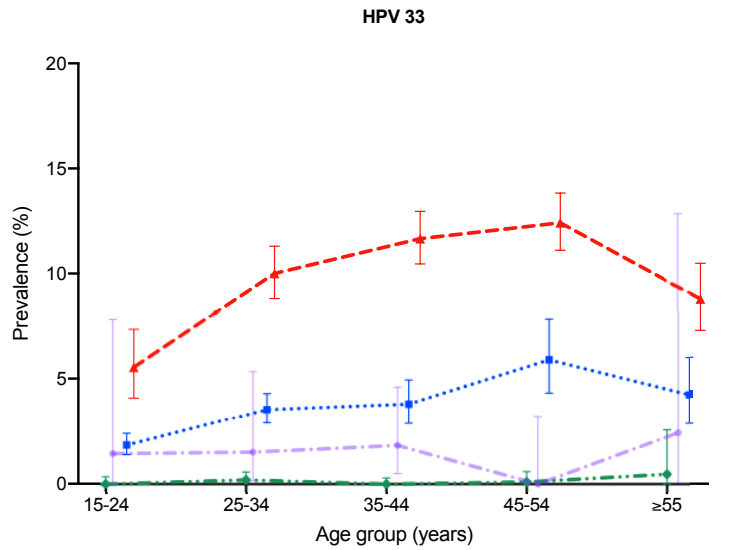

|                                                          |                         |                  |                         |                         |                  |
|----------------------------------------------------------|-------------------------|------------------|-------------------------|-------------------------|------------------|
| <span style="color: red;">—▲</span> HIV+MSM (n/N, %)     | 46/827 (5.6%)           | 231/2308 (10.0%) | 304/2606 (11.7%)        | 289/2327 (12.4%)        | 112/1273 (8.8%)  |
| aPR (95%CI)                                              | <b>0.64 (0.46-0.89)</b> | Ref.             | 1.01 (0.85-1.20)        | 1.06 (0.88-1.28)        | 0.80 (0.63-1.02) |
| <span style="color: blue;">-■-</span> HIV+MSM (n/N, %)   | 55/2962 (1.9%)          | 101/2834 (3.6%)  | 54/1411 (3.8%)          | 45/761 (5.9%)           | 30/705 (4.3%)    |
| aPR (95%CI)                                              | <b>0.53 (0.37-0.76)</b> | Ref.             | 0.90 (0.63-1.29)        | 1.33 (0.88-2.02)        | 1.03 (0.60-1.75) |
| <span style="color: purple;">-◆-</span> HIV+MSW (n/N, %) | 1/69 (1.4%)             | 2/132 (1.5%)     | 4/218 (1.8%)            | 0/112 (0.0%)            | 1/41 (2.4%)      |
| aPR (95%CI)                                              | 0.96 (0.02-18.7)        | Ref.             | <b>0.89 (0.16-5.03)</b> | 0.00 (0.00-2.26)        | 0.39 (0.02-6.04) |
| <span style="color: green;">-◆-</span> HIV+MSW (n/N, %)  | 0/1055 (0.0%)           | 3/1509 (0.2%)    | 0/1266 (0.0%)           | 1/940 (0.1%)            | 1/214 (0.5%)     |
| aPR (95%CI)                                              | 0.00 (0.00-1.83)        | Ref.             | 0.00 (0.00-1.53)        | <b>0.63 (0.06-6.93)</b> | 1.34 (0.09-19.5) |

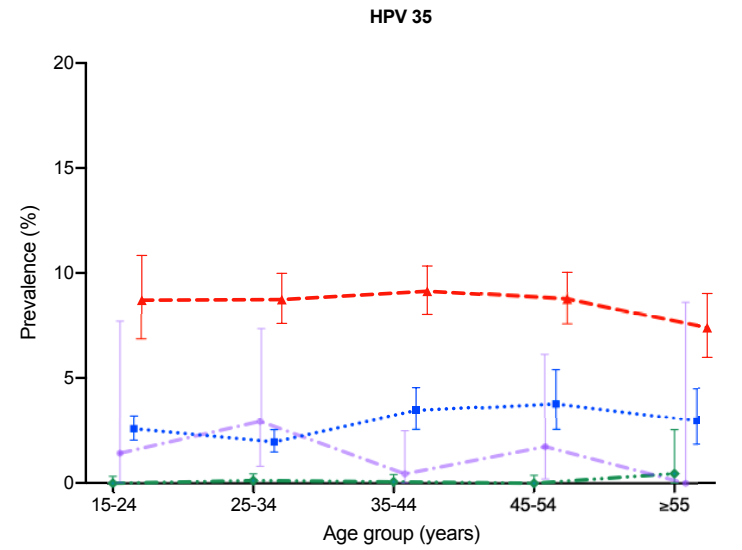

|                                                          |                  |                 |                  |                         |                         |
|----------------------------------------------------------|------------------|-----------------|------------------|-------------------------|-------------------------|
| <span style="color: red;">—▲</span> HIV+MSM (n/N, %)     | 72/827 (8.7%)    | 197/2254 (8.7%) | 228/2496 (9.1%)  | 187/2137 (8.8%)         | 89/1203 (7.4%)          |
| aPR (95%CI)                                              | 0.88 (0.67-1.17) | Ref.            | 1.06 (0.87-1.28) | 0.93 (0.74-1.16)        | <b>0.71 (0.53-0.94)</b> |
| <span style="color: blue;">-■-</span> HIV+MSM (n/N, %)   | 77/2972 (2.6%)   | 56/2852 (2.0%)  | 49/1419 (3.5%)   | 29/762 (3.8%)           | 21/705 (3.0%)           |
| aPR (95%CI)                                              | 1.08 (0.75-1.57) | Ref.            | 1.36 (0.87-2.13) | 1.12 (0.64-1.97)        | 0.82 (0.42-1.60)        |
| <span style="color: purple;">-◆-</span> HIV+MSW (n/N, %) | 1/70 (1.4%)      | 4/136 (2.9%)    | 1/221 (0.5%)     | 2/115 (1.7%)            | 0/41 (0.0%)             |
| aPR (95%CI)                                              | 1.16 (0.13-10.6) | Ref.            | 0.14 (0.02-1.26) | <b>0.67 (0.12-3.80)</b> | 0.00 (0.00-3.19)        |
| <span style="color: green;">-◆-</span> HIV+MSW (n/N, %)  | 0/1094 (0.0%)    | 2/1585 (0.1%)   | 1/1315 (0.1%)    | 0/950 (0.0%)            | 1/217 (0.5%)            |
| aPR (95%CI)                                              | 0.00 (0.00-2.78) | Ref.            | 0.70 (0.06-8.18) | 0.00 (0.00-3.21)        | <b>4.36 (0.39-49.4)</b> |

HPV 39

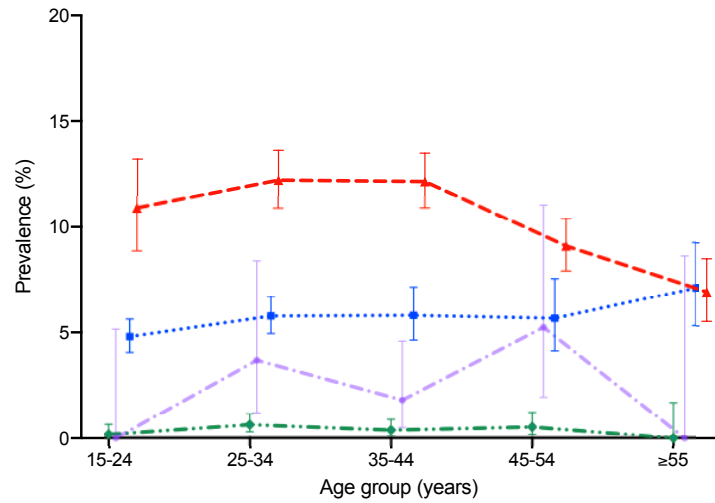

| Category         | 15-24            | 25-34            | 35-44            | 45-54                   | ≥55                     |
|------------------|------------------|------------------|------------------|-------------------------|-------------------------|
| HIV+MSM (n/N, %) | 90/827 (10.9%)   | 275/2254 (12.2%) | 303/2496 (12.1%) | 194/2137 (9.1%)         | 83/1203 (6.9%)          |
| aPR (95%CI)      | 0.88 (0.69-1.12) | Ref.             | 1.03 (0.88-1.21) | <b>0.80 (0.65-0.98)</b> | <b>0.57 (0.43-0.75)</b> |
| HIV+MSM (n/N, %) | 142/2972 (4.8%)  | 164/2852 (5.8%)  | 82/1419 (5.8%)   | 43/762 (5.6%)           | 50/705 (7.1%)           |
| aPR (95%CI)      | 0.88 (0.70-1.11) | Ref.             | 0.86 (0.65-1.16) | 0.70 (0.47-1.03)        | 0.80 (0.52-1.25)        |
| HIV+MSW (n/N, %) | 0/70 (0.0%)      | 5/136 (3.7%)     | 4/221 (1.8%)     | 6/115 (5.2%)            | 0/41 (0.0%)             |
| aPR (95%CI)      | 0.00 (0.00-1.47) | Ref.             | 0.45 (0.12-1.67) | 1.02 (0.29-3.57)        | 0.00 (0.00-2.53)        |
| HIV+MSW (n/N, %) | 2/1094 (0.2%)    | 10/1585 (0.6%)   | 5/1315 (0.4%)    | 5/950 (0.5%)            | 0/217 (0.0%)            |
| aPR (95%CI)      | 0.36 (0.08-1.65) | Ref.             | 0.60 (0.20-1.76) | 0.31 (0.06-1.48)        | 0.00 (0.00-2.80)        |

HPV 45

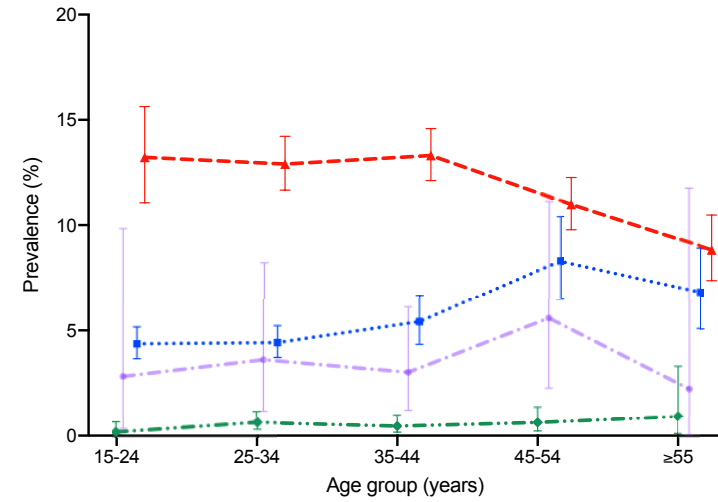

| Category         | 15-24            | 25-34            | 35-44            | 45-54                   | ≥55                     |
|------------------|------------------|------------------|------------------|-------------------------|-------------------------|
| HIV+MSM (n/N, %) | 117/885 (13.2%)  | 351/2721 (12.9%) | 397/2982 (13.3%) | 277/2523 (11.0%)        | 118/1337 (8.8%)         |
| aPR (95%CI)      | 1.07 (0.86-1.33) | Ref.             | 0.95 (0.82-1.09) | <b>0.78 (0.65-0.93)</b> | <b>0.61 (0.49-0.77)</b> |
| HIV+MSM (n/N, %) | 131/3014 (4.3%)  | 134/3042 (4.4%)  | 83/1538 (5.4%)   | 66/797 (8.3%)           | 49/721 (6.8%)           |
| aPR (95%CI)      | 0.82 (0.63-1.06) | Ref.             | 1.09 (0.81-1.47) | 1.31 (0.92-1.87)        | 0.99 (0.64-1.53)        |
| HIV+MSW (n/N, %) | 2/71 (2.8%)      | 5/139 (3.6%)     | 7/233 (3.0%)     | 7/126 (5.6%)            | 1/45 (2.2%)             |
| aPR (95%CI)      | 2.56 (0.54-12.2) | Ref.             | 0.89 (0.29-2.77) | 1.85 (0.57-5.98)        | 1.26 (0.14-11.0)        |
| HIV+MSW (n/N, %) | 2/1094 (0.2%)    | 10/1585 (0.6%)   | 6/1315 (0.5%)    | 6/950 (0.6%)            | 2/217 (0.9%)            |
| aPR (95%CI)      | 0.38 (0.08-1.75) | Ref.             | 0.80 (0.29-2.22) | 1.10 (0.38-3.18)        | 1.35 (0.28-6.54)        |

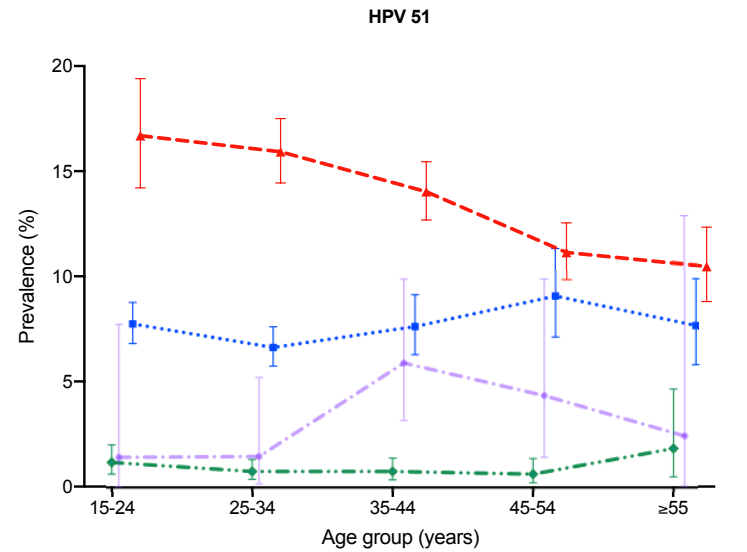

|                         | 15-24            | 25-34            | 35-44            | 45-54                   | ≥55                     |
|-------------------------|------------------|------------------|------------------|-------------------------|-------------------------|
| <b>HIV+MSM (n/N, %)</b> | 138/827 (16.7%)  | 359/2254 (15.9%) | 350/2496 (14.0%) | 238/2137 (11.1%)        | 126/1203 (10.5%)        |
| <b>aPR (95%CI)</b>      | 0.97 (0.80-1.18) | Ref.             | 0.94 (0.81-1.08) | <b>0.79 (0.66-0.95)</b> | <b>0.71 (0.57-0.89)</b> |
| <b>HIV-MSM (n/N, %)</b> | 230/2972 (7.7%)  | 189/2852 (6.6%)  | 108/1419 (7.6%)  | 69/762 (9.1%)           | 54/705 (7.7%)           |
| <b>aPR (95%CI)</b>      | 1.01 (0.82-1.24) | Ref.             | 1.00 (0.78-1.28) | 1.12 (0.81-1.54)        | 0.98 (0.66-1.47)        |
| <b>HIV+MSW (n/N, %)</b> | 1/70 (1.4%)      | 2/136 (1.5%)     | 13/221 (5.9%)    | 5/115 (4.3%)            | 1/41 (2.4%)             |
| <b>aPR (95%CI)</b>      | 2.79 (0.28-28.3) | Ref.             | 4.18 (0.97-17.9) | 3.13 (0.61-16.0)        | 1.45 (0.13-16.0)        |
| <b>HIV-MSW (n/N, %)</b> | 13/1094 (1.2%)   | 12/1585 (0.8%)   | 10/1315 (0.8%)   | 6/950 (0.6%)            | 4/217 (1.8%)            |
| <b>aPR (95%CI)</b>      | 1.51 (0.67-3.38) | Ref.             | 1.03 (0.44-2.38) | 0.98 (0.36-2.69)        | 1.85 (0.57-6.03)        |

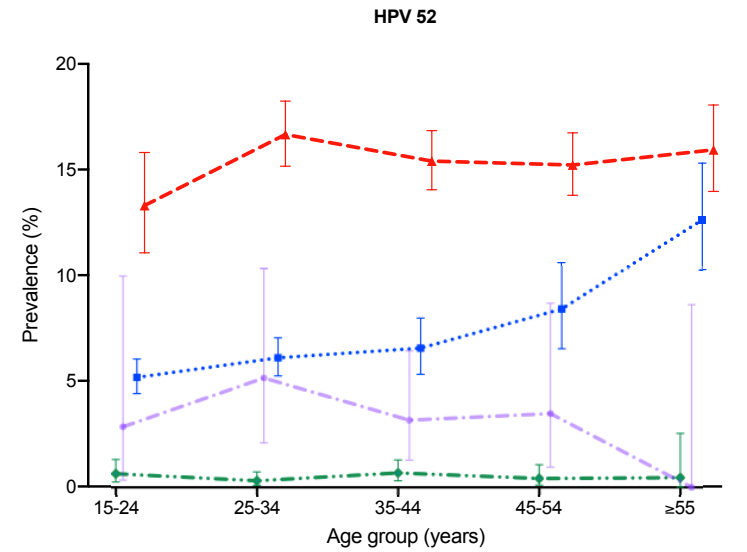

|                         | 15-24                   | 25-34            | 35-44            | 45-54                   | ≥55                     |
|-------------------------|-------------------------|------------------|------------------|-------------------------|-------------------------|
| <b>HIV+MSM (n/N, %)</b> | 110/827 (13.3%)         | 386/2317 (16.7%) | 404/2623 (15.4%) | 357/2346 (15.2%)        | 203/1274 (15.9%)        |
| <b>aPR (95%CI)</b>      | <b>0.71 (0.57-0.88)</b> | Ref.             | 0.91 (0.80-1.04) | <b>0.81 (0.69-0.94)</b> | <b>0.74 (0.62-0.89)</b> |
| <b>HIV-MSM (n/N, %)</b> | 154/2972 (5.2%)         | 174/2852 (6.1%)  | 93/1419 (6.6%)   | 64/762 (8.4%)           | 89/705 (12.6%)          |
| <b>aPR (95%CI)</b>      | 0.89 (0.71-1.12)        | Ref.             | 1.01 (0.77-1.31) | 1.04 (0.75-1.46)        | 1.16 (0.80-1.69)        |
| <b>HIV+MSW (n/N, %)</b> | 2/70 (2.9%)             | 7/136 (5.1%)     | 7/221 (3.2%)     | 4/115 (3.5%)            | 0/41 (0.0%)             |
| <b>aPR (95%CI)</b>      | 1.32 (0.31-5.54)        | Ref.             | 0.52 (0.19-1.42) | 0.60 (0.18-2.03)        | 0.00 (0.00-1.77)        |
| <b>HIV-MSW (n/N, %)</b> | 7/1094 (0.6%)           | 5/1585 (0.3%)    | 9/1315 (0.7%)    | 4/950 (0.4%)            | 1/217 (0.5%)            |
| <b>aPR (95%CI)</b>      | 1.60 (0.50-5.14)        | Ref.             | 2.58 (0.86-7.79) | 1.46 (0.37-5.78)        | 1.61 (0.15-17.4)        |

HPV 56

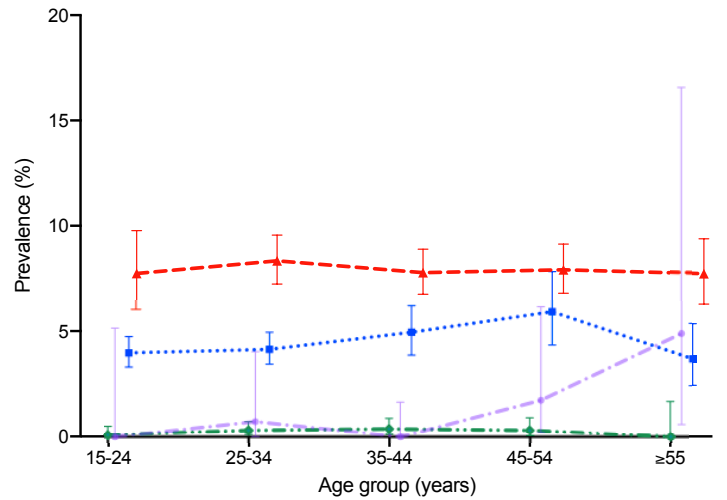

| Category         | 15-24            | 25-34           | 35-44            | 45-54            | ≥55                      |
|------------------|------------------|-----------------|------------------|------------------|--------------------------|
| HIV+MSM (n/N, %) | 64/827 (7.7%)    | 188/2254 (8.3%) | 194/2496 (7.8%)  | 169/2137 (7.9%)  | 93/1203 (7.7%)           |
| aPR (95%CI)      | 0.75 (0.56-1.02) | Ref.            | 0.96 (0.78-1.18) | 0.96 (0.75-1.23) | 0.90 (0.67-1.20)         |
| HIV-MSM (n/N, %) | 118/2972 (4.0%)  | 118/2852 (4.1%) | 70/1419 (4.9%)   | 45/762 (5.9%)    | 26/705 (3.7%)            |
| aPR (95%CI)      | 0.92 (0.70-1.22) | Ref.            | 1.02 (0.74-1.41) | 1.12 (0.75-1.69) | 0.64 (0.37-1.10)         |
| HIV+MSW (n/N, %) | 0/70 (0.0%)      | 1/136 (0.7%)    | 0/221 (0.0%)     | 2/115 (1.7%)     | 2/41 (4.9%)              |
| aPR (95%CI)      | 0.00 (0.00-)     | Ref.            | 0.00 (0.00-2.53) | 2.95 (0.28-31.5) | <b>8.88 (0.55-143.8)</b> |
| HIV-MSW (n/N, %) | 1/1094 (0.1%)    | 5/1585 (0.3%)   | 5/1315 (0.4%)    | 3/950 (0.3%)     | 0/217 (0.0%)             |
| aPR (95%CI)      | 0.26 (0.03-2.11) | Ref.            | 1.77 (0.49-6.37) | 1.33 (0.38-4.67) | 0.00 (0.00-5.62)         |

HPV 58

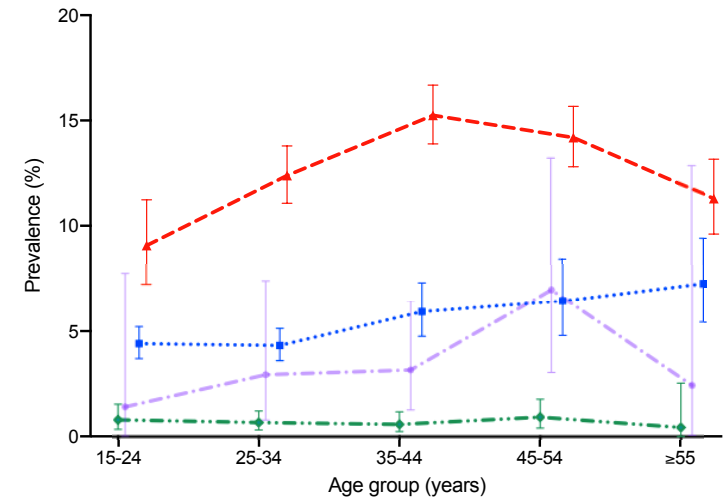

| Category         | 15-24                   | 25-34            | 35-44                   | 45-54                   | ≥55                     |
|------------------|-------------------------|------------------|-------------------------|-------------------------|-------------------------|
| HIV+MSM (n/N, %) | 75/827 (9.1%)           | 287/2317 (12.4%) | 400/2623 (15.2%)        | 333/2346 (14.2%)        | 144/1275 (11.3%)        |
| aPR (95%CI)      | <b>0.68 (0.52-0.87)</b> | Ref.             | <b>1.19 (1.02-1.38)</b> | 1.04 (0.87-1.23)        | 0.81 (0.66-1.01)        |
| HIV-MSM (n/N, %) | 131/2972 (4.4%)         | 123/2852 (4.3%)  | 84/1419 (5.9%)          | 49/762 (6.4%)           | 51/705 (7.2%)           |
| aPR (95%CI)      | 0.99 (0.77-1.28)        | Ref.             | <b>1.78 (1.33-2.37)</b> | <b>2.04 (1.41-2.96)</b> | <b>2.78 (1.76-4.39)</b> |
| HIV+MSW (n/N, %) | 1/70 (1.4%)             | 4/136 (2.9%)     | 7/221 (3.2%)            | 8/115 (7.0%)            | 1/41 (2.4%)             |
| aPR (95%CI)      | 1.34 (0.16-11.6)        | Ref.             | 1.03 (0.31-3.46)        | 1.74 (0.51-5.98)        | 0.57 (0.06-5.15)        |
| HIV-MSW (n/N, %) | 9/1094 (0.8%)           | 11/1585 (0.7%)   | 8/1315 (0.6%)           | 9/950 (0.9%)            | 1/217 (0.5%)            |
| aPR (95%CI)      | 1.30 (0.54-3.15)        | Ref.             | 0.71 (0.29-1.77)        | 0.79 (0.33-1.92)        | 0.82 (0.09-7.21)        |

HPV 59

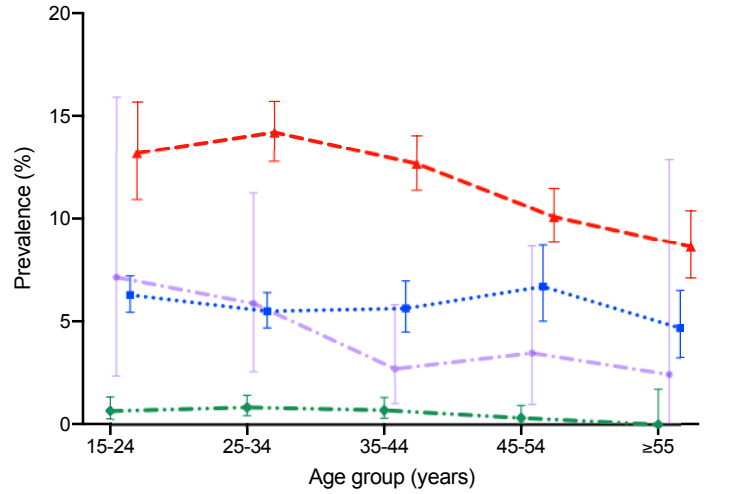

| Category         | 15-24            | 25-34            | 35-44            | 45-54                   | ≥55                     |
|------------------|------------------|------------------|------------------|-------------------------|-------------------------|
| HIV+MSM (n/N, %) | 109/827 (13.2%)  | 320/2254 (14.2%) | 316/2496 (12.7%) | 216/2137 (10.1%)        | 104/1203 (8.6%)         |
| aPR (95%CI)      | 1.04 (0.83-1.30) | Ref.             | 0.89 (0.77-1.04) | <b>0.76 (0.63-0.69)</b> | <b>0.64 (0.50-0.82)</b> |
| HIV-MSM (n/N, %) | 187/2972 (6.3%)  | 157/2852 (5.5%)  | 80/1419 (5.6%)   | 51/762 (6.7%)           | 33/705 (4.7%)           |
| aPR (95%CI)      | 1.06 (0.85-1.32) | Ref.             | 1.05 (0.78-1.41) | 0.99 (0.67-1.45)        | 0.65 (0.40-1.06)        |
| HIV+MSW (n/N, %) | 5/70 (7.1%)      | 8/136 (5.9%)     | 6/221 (2.7%)     | 4/115 (3.5%)            | 1/41 (2.4%)             |
| aPR (95%CI)      | 1.38 (0.34-5.63) | Ref.             | 0.46 (0.17-1.29) | 0.55 (0.15-2.07)        | 0.41 (0.04-4.69)        |
| HIV-MSW (n/N, %) | 7/1094 (0.6%)    | 13/1585 (0.8%)   | 9/1315 (0.7%)    | 3/950 (0.3%)            | 0/217 (0.0%)            |
| aPR (95%CI)      | 0.52 (0.20-1.34) | Ref.             | 0.82 (0.34-2.00) | 0.32 (0.07-1.45)        | 0.00 (0.00-2.15)        |

HPV 68

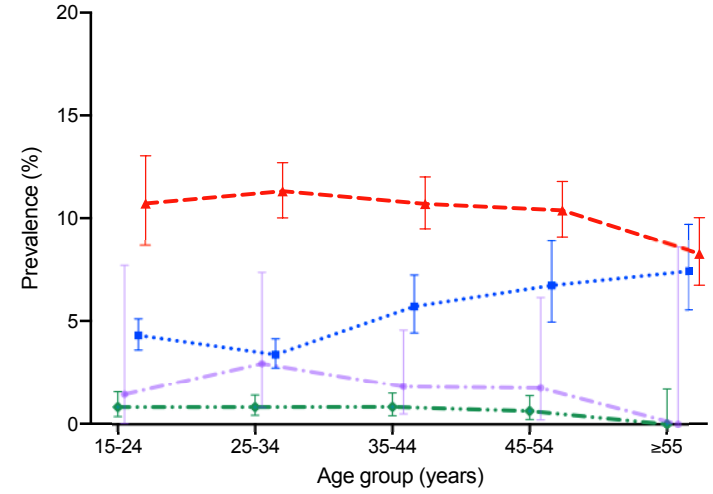

| Category         | 15-24            | 25-34            | 35-44                   | 45-54                   | ≥55                     |
|------------------|------------------|------------------|-------------------------|-------------------------|-------------------------|
| HIV+MSM (n/N, %) | 88/821 (10.7%)   | 250/2210 (11.3%) | 255/2384 (10.7%)        | 210/2023 (10.4%)        | 95/1148 (8.3%)          |
| aPR (95%CI)      | 0.87 (0.68-1.12) | Ref.             | 0.90 (0.75-1.07)        | <b>0.77 (0.63-0.96)</b> | <b>0.58 (0.44-0.76)</b> |
| HIV-MSM (n/N, %) | 126/2921 (4.3%)  | 89/2628 (3.4%)   | 64/1120 (5.7%)          | 45/668 (6.7%)           | 49/660 (7.4%)           |
| aPR (95%CI)      | 1.26 (0.95-1.67) | Ref.             | <b>1.56 (1.09-2.24)</b> | 1.51 (0.97-2.36)        | <b>1.79 (1.09-2.94)</b> |
| HIV+MSW (n/N, %) | 1/70 (1.4%)      | 4/136 (2.9%)     | 4/221 (1.8%)            | 2/115 (1.7%)            | 0/41 (0.0%)             |
| aPR (95%CI)      | 0.79 (0.02-8.12) | Ref.             | 0.60 (0.15-2.37)        | 0.55 (0.10-3.05)        | 0.00 (0.00-5.22)        |
| HIV-MSW (n/N, %) | 9/1094 (0.8%)    | 13/1585 (0.8%)   | 11/1315 (0.8%)          | 6/950 (0.6%)            | 0/217 (0.0%)            |
| aPR (95%CI)      | 0.76 (0.32-1.79) | Ref.             | 0.99 (0.44-2.22)        | 0.69 (0.25-1.86)        | 0.00 (0.00-2.15)        |

**Appendix Figure 2: Age-specific prevalence of A) 2v-HPV, B) 4v-HPV, and C) 9v-HPV infection in four male risk groups.** Error bars show 95% CIs. PRs were adjusted for study. HPV=human papillomavirus. 2v-HPV=HPV16 and 18. 4v-HPV=HPV6, 11, 16, and 18. 9v-HPV=HPV6, 11, 16, 18, 31, 33, 45, 52, and 58. HIV+=HIV positive. HIV-=HIV negative. MSM=men who have sex with men. MSW=men who have sex with women. aPR=adjusted prevalence ratio. Significant aPRs relative to the reference group are shown in bold.

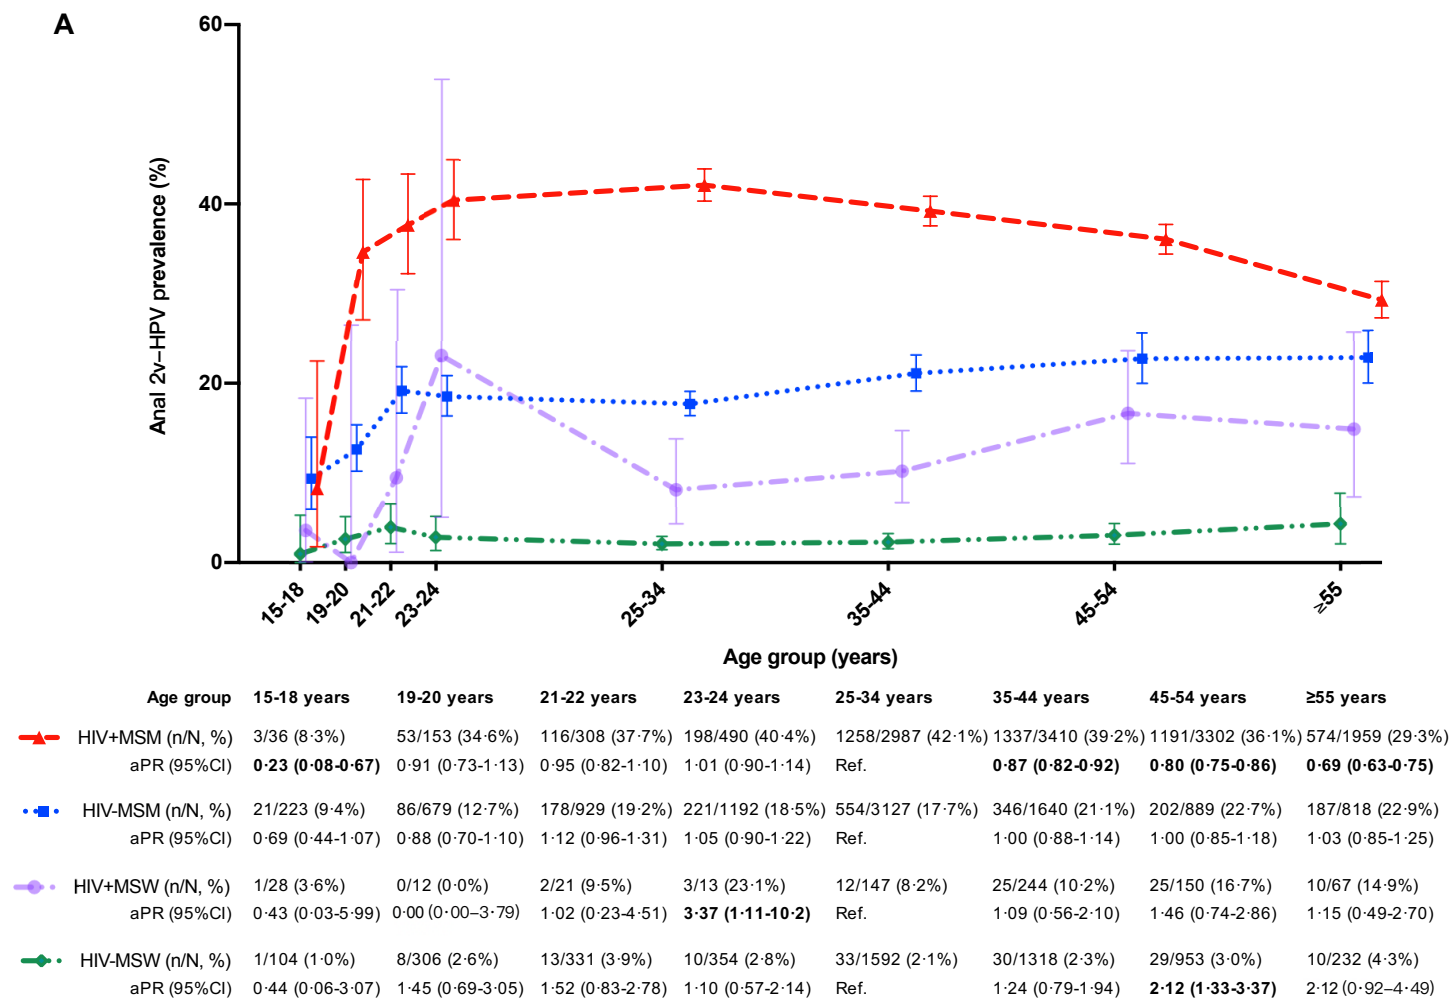



B

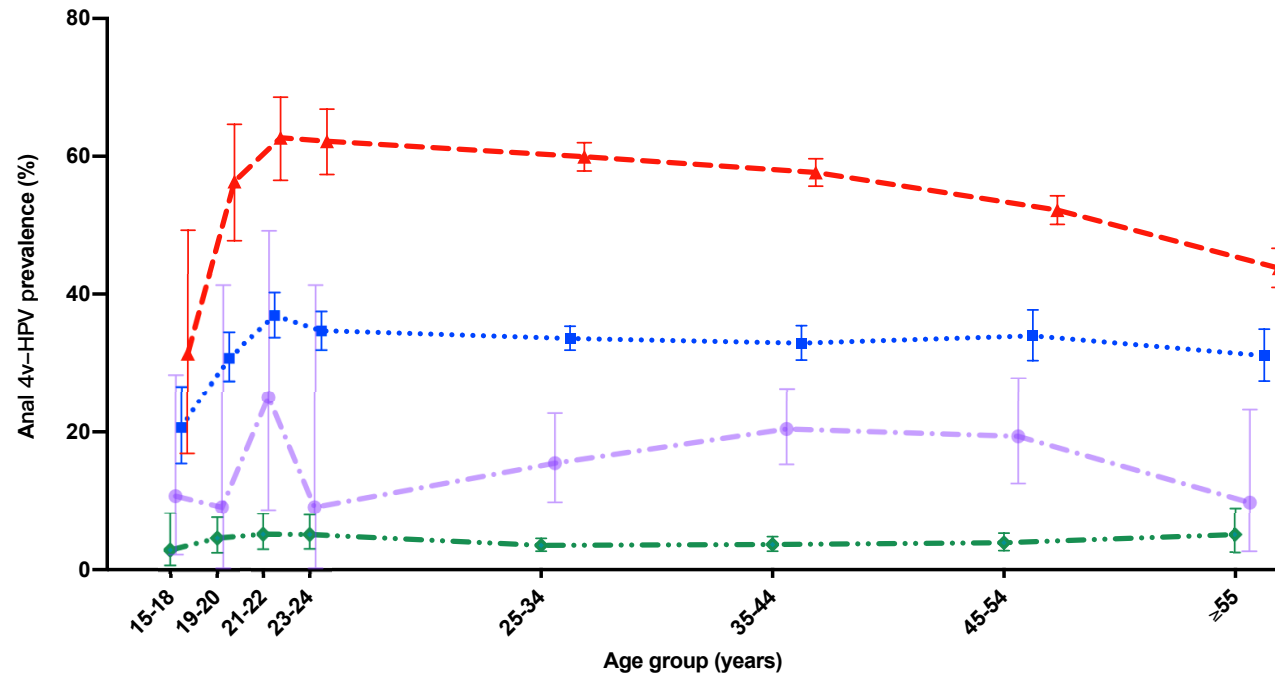

|                                         | Age group        | 15-18 years             | 19-20 years      | 21-22 years             | 23-24 years      | 25-34 years       | 35-44 years             | 45-54 years             | ≥55 years               |
|-----------------------------------------|------------------|-------------------------|------------------|-------------------------|------------------|-------------------|-------------------------|-------------------------|-------------------------|
| <span style="color: red;">—▲</span>     | HIV+MSM (n/N, %) | 11/35 (31.4%)           | 80/142 (56.3%)   | 163/260 (62.7%)         | 260/418 (62.2%)  | 1326/2212 (59.9%) | 1400/2428 (57.7%)       | 1190/2280 (52.2%)       | 532/1215 (43.8%)        |
|                                         | aPR (95%CI)      | <b>0.60 (0.37-0.95)</b> | 1.00 (0.87-1.16) | 1.08 (0.99-1.18)        | 1.06 (0.98-1.14) | Ref.              | <b>0.92 (0.88-0.96)</b> | <b>0.86 (0.82-0.91)</b> | <b>0.76 (0.70-0.82)</b> |
| <span style="color: blue;">-■-</span>   | HIV-MSM (n/N, %) | 45/219 (20.5%)          | 200/650 (30.8%)  | 322/872 (36.9%)         | 400/1153 (34.7%) | 973/2898 (33.6%)  | 459/1396 (32.9%)        | 223/657 (33.9%)         | 187/602 (31.1%)         |
|                                         | aPR (95%CI)      | 0.76 (0.57-1.00)        | 1.11 (0.97-1.27) | <b>1.15 (1.04-1.28)</b> | 1.07 (0.97-1.18) | Ref.              | 0.94 (0.86-1.03)        | 0.97 (0.86-1.10)        | 0.95 (0.80-1.13)        |
| <span style="color: purple;">-●-</span> | HIV+MSW (n/N, %) | 3/28 (10.7%)            | 1/11 (9.1%)      | 5/20 (25.0%)            | 1/11 (9.1%)      | 21/136 (15.4%)    | 45/221 (20.4%)          | 22/114 (19.3%)          | 4/41 (9.8%)             |
|                                         | aPR (95%CI)      | 2.73 (0.56-13.3)        | 1.41 (0.22-9.12) | <b>4.28 (1.70-10.7)</b> | 0.73 (0.11-4.83) | Ref.              | 1.30 (0.80-2.11)        | 1.26 (0.71-2.23)        | 0.70 (0.24-2.04)        |
| <span style="color: green;">-◆-</span>  | HIV-MSW (n/N, %) | 3/104 (2.9%)            | 14/306 (4.6%)    | 17/331 (5.1%)           | 18/353 (5.1%)    | 56/1585 (3.5%)    | 48/1314 (3.7%)          | 37/949 (3.9%)           | 11/216 (5.1%)           |
|                                         | aPR (95%CI)      | 0.95 (0.32-2.79)        | 1.52 (0.88-2.63) | 1.25 (0.76-2.08)        | 1.34 (0.82-2.21) | Ref.              | 1.27 (0.87-1.85)        | <b>1.59 (1.05-2.41)</b> | 1.36 (0.70-2.62)        |

C

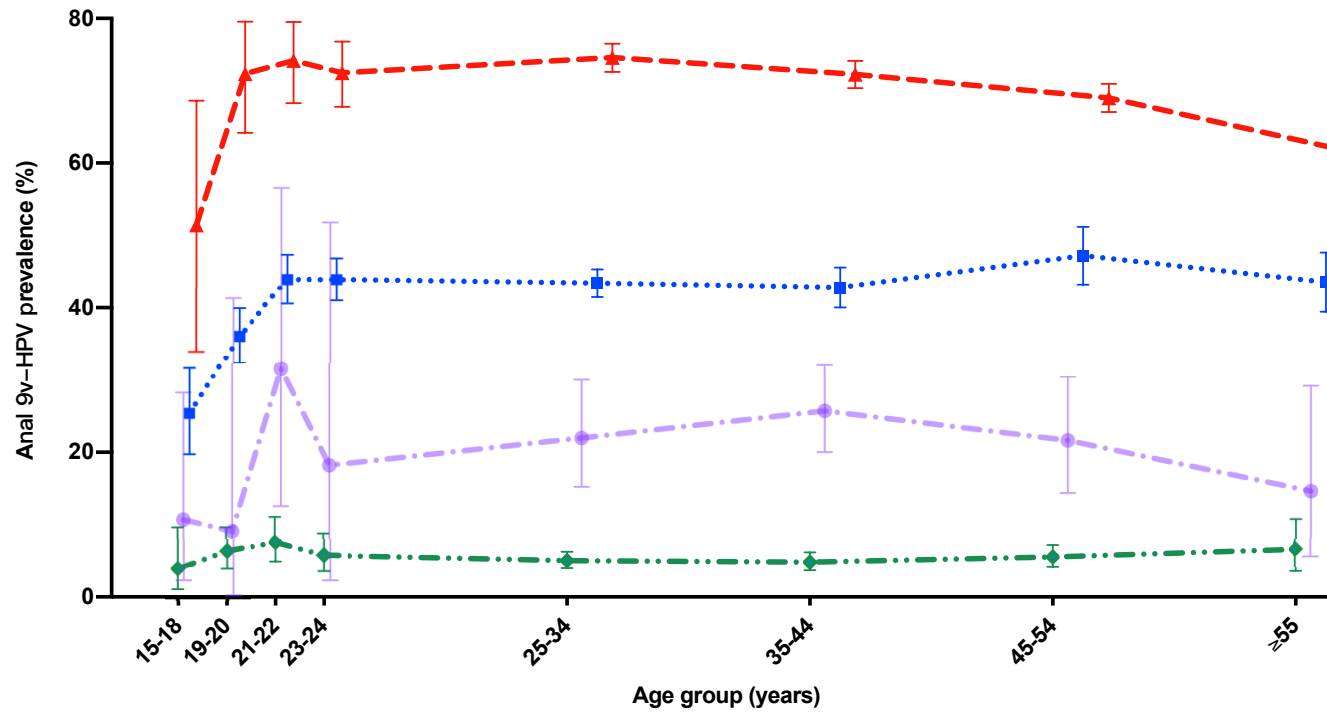

|     | Age group        | 15-18 years             | 19-20 years      | 21-22 years             | 23-24 years      | 25-34 years       | 35-44 years             | 45-54 years             | ≥55 years               |
|-----|------------------|-------------------------|------------------|-------------------------|------------------|-------------------|-------------------------|-------------------------|-------------------------|
| —▲— | HIV+MSM (n/N, %) | 18/35 (51.4%)           | 102/141 (72.3%)  | 184/248 (74.2%)         | 287/396 (72.5%)  | 1471/1972 (74.6%) | 1632/2258 (72.3%)       | 1540/2231 (69.0%)       | 748/1209 (61.9%)        |
|     | aPR (95%CI)      | 0.80 (0.59-1.09)        | 1.02 (0.91-1.14) | 1.02 (0.95-1.09)        | 0.99 (0.93-1.06) | Ref.              | <b>0.95 (0.92-0.98)</b> | <b>0.92 (0.89-0.96)</b> | <b>0.84 (0.79-0.88)</b> |
| •■• | HIV+MSM (n/N, %) | 55/217 (25.3%)          | 232/643 (36.1%)  | 375/854 (43.9%)         | 495/1128 (43.9%) | 1167/2690 (43.4%) | 543/1269 (42.8%)        | 293/621 (47.2%)         | 255/586 (43.5%)         |
|     | aPR (95%CI)      | <b>0.71 (0.56-0.91)</b> | 0.94 (0.84-1.06) | 1.00 (0.92-1.09)        | 0.98 (0.90-1.06) | Ref.              | 0.97 (0.90-1.05)        | 1.02 (0.92-1.12)        | 0.96 (0.83-1.09)        |
| —●— | HIV+MSW (n/N, %) | 3/28 (10.7%)            | 1/11 (9.1%)      | 6/19 (31.6%)            | 2/11 (18.2%)     | 29/132 (22.0%)    | 56/218 (25.7%)          | 24/111 (21.6%)          | 6/41 (14.6%)            |
|     | aPR (95%CI)      | 2.12 (0.51-8.78)        | 0.97 (0.15-6.36) | <b>4.17 (2.05-8.49)</b> | 1.11 (0.32-3.84) | Ref.              | 1.12 (0.76-1.67)        | 0.97 (0.59-1.59)        | 0.71 (0.30-1.65)        |
| —◆— | HIV+MSW (n/N, %) | 4/103 (3.9%)            | 19/303 (6.3%)    | 24/317 (7.6%)           | 19/332 (5.7%)    | 76/1509 (5.0%)    | 61/1265 (4.8%)          | 52/939 (5.5%)           | 14/213 (6.6%)           |
|     | aPR (95%CI)      | 0.86 (0.35-2.12)        | 1.62 (0.98-2.66) | 1.39 (0.91-2.12)        | 1.13 (0.71-1.78) | Ref.              | 1.13 (0.81-1.57)        | 1.32 (0.92-1.89)        | 1.26 (0.70-2.26)        |

**Appendix Figure 3: Overall and age-specific distribution of number of HR-HPV infections in four male risk groups.** HR-HPV=high-risk human papillomavirus=HPV16, 18, 31, 33, 35, 39, 45, 51, 52, 56, 58, 59, and 68. HIV+=HIV positive; HIV-=HIV negative. MSM=men who have sex with men. MSW=men who have sex with women.

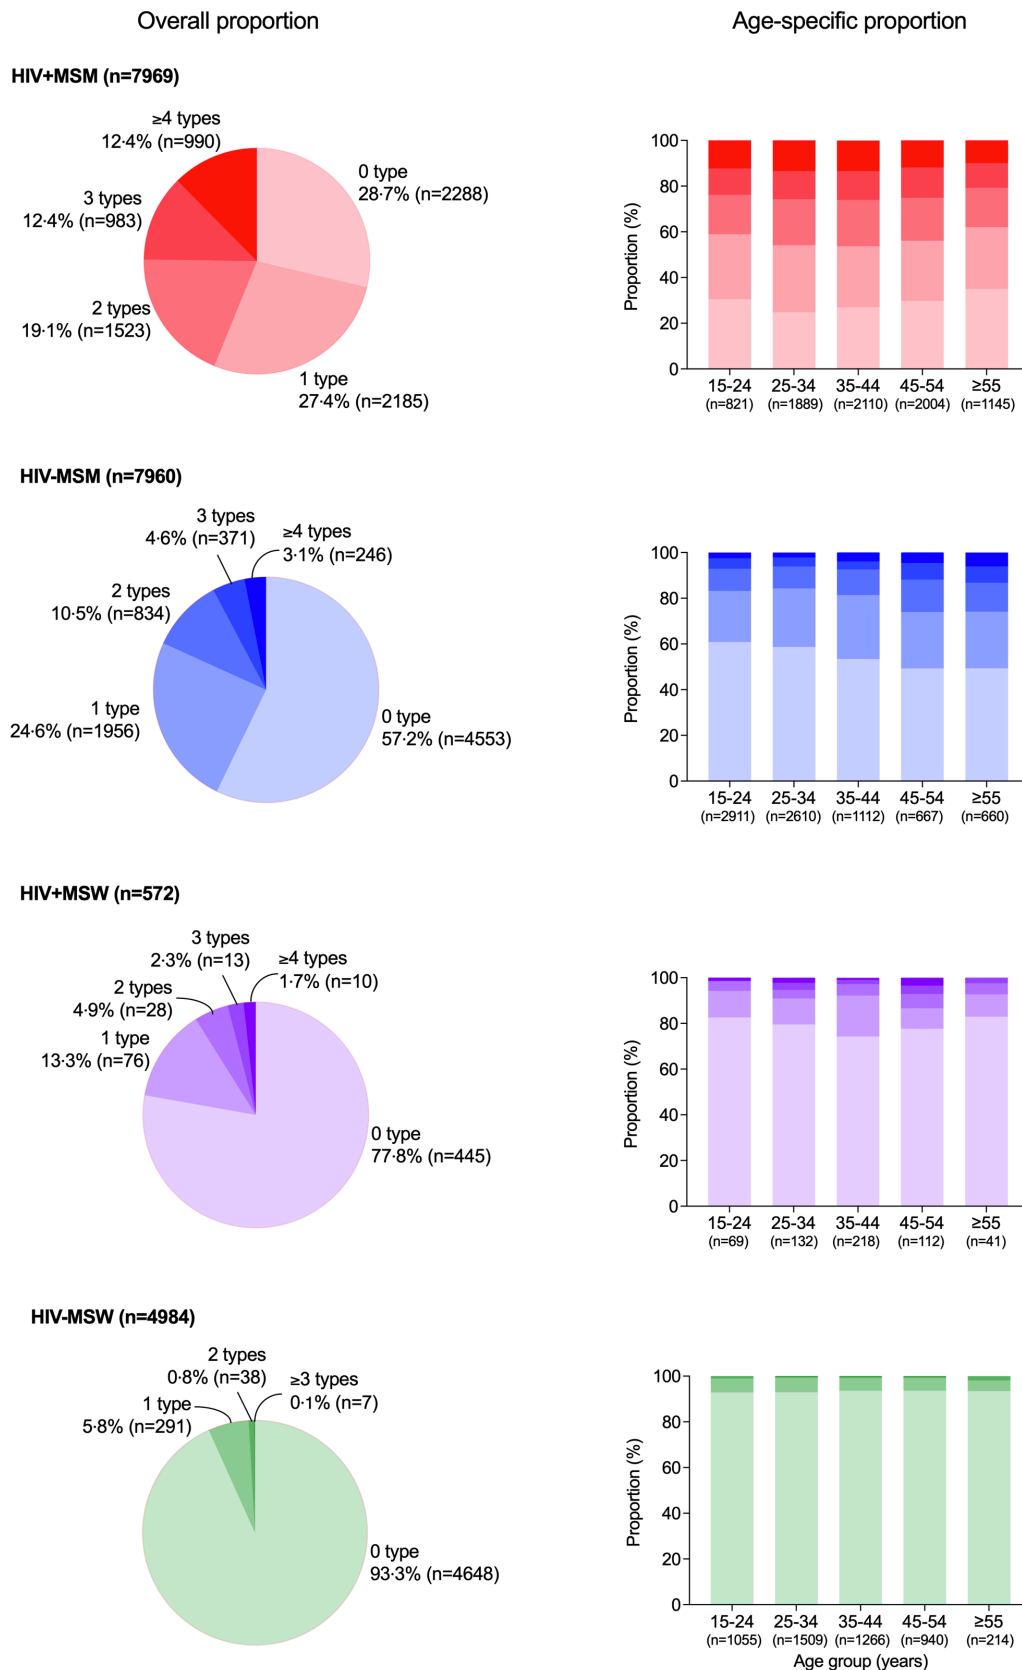

**Appendix Figure 4: Prevalence of A) HPV16 and B) HR-HPV infection in four male risk groups with or without cytopathological data.** Error bars show 95% CIs. PRs were adjusted for age group. HR-HPV=high-risk human papillomavirus=HPV16, 18, 31, 33, 35, 39, 45, 51, 52, 56, 58, 59, and 68. HIV+=HIV positive. HIV-=HIV negative. MSM=men who have sex with men. MSW=men who have sex with women. PR=prevalence ratio (no cytopathology versus cytopathology). aPR=adjusted prevalence ratio (no cytopathology versus cytopathology). Significant PRs and aPRs relative to the reference group are shown in bold. Solid circles indicate men without cytopathological data, and open circles indicate men with cytopathological data.

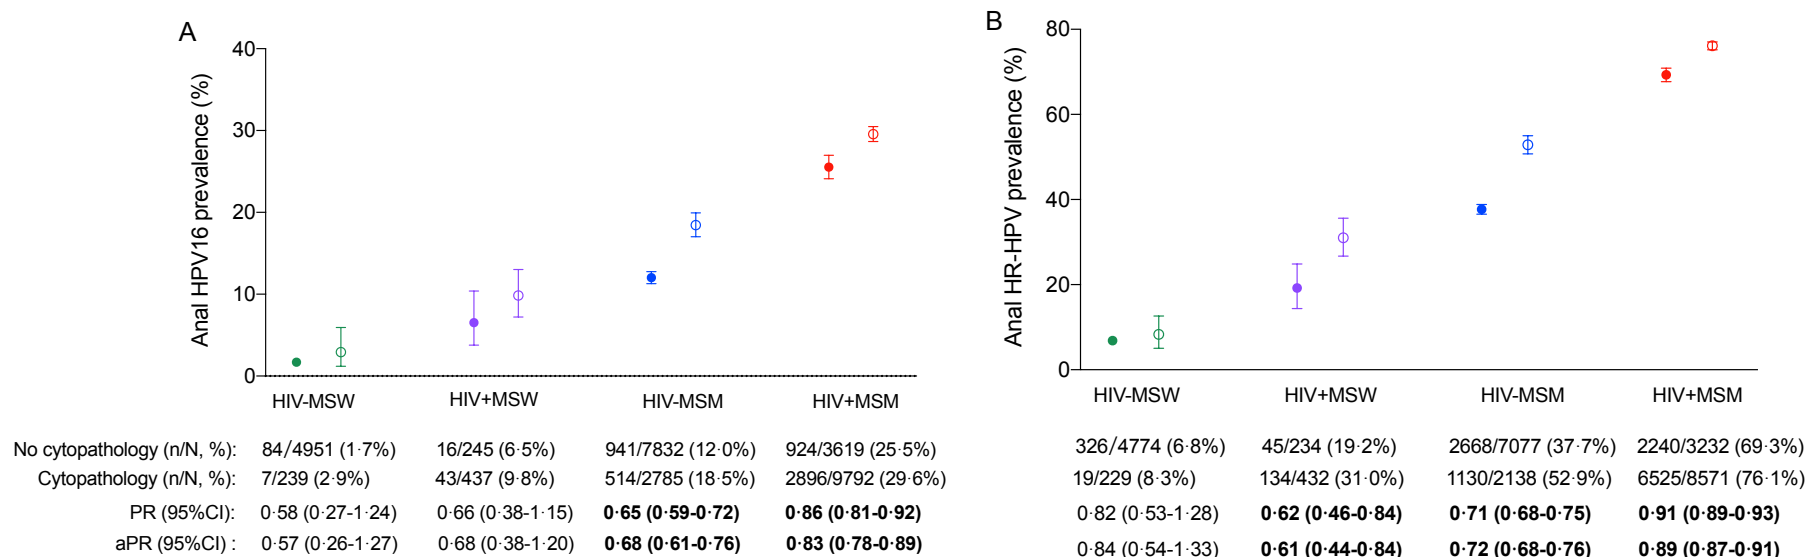

**Appendix Figure 5: Prevalence of anal HPV infection in men with or without cytopathological data by age group: A) HPV16 in HIV-positive MSM, B) HR-HPV in HIV-positive MSM, C) HPV16 in HIV-negative MSM, and D) HR-HPV in HIV-negative MSM.** Error bars show 95% CIs. HR-HPV=high-risk human papillomavirus=HPV16, 18, 31, 33, 35, 39, 45, 51, 52, 56, 58, 59, and 68. MSM=men who have sex with men. PR=prevalence ratio (no cytopathology versus cytopathology). Significant PRs relative to the reference group are shown in bold. Solid circles indicate men without cytopathological data, and open circles indicate men with cytopathological data.

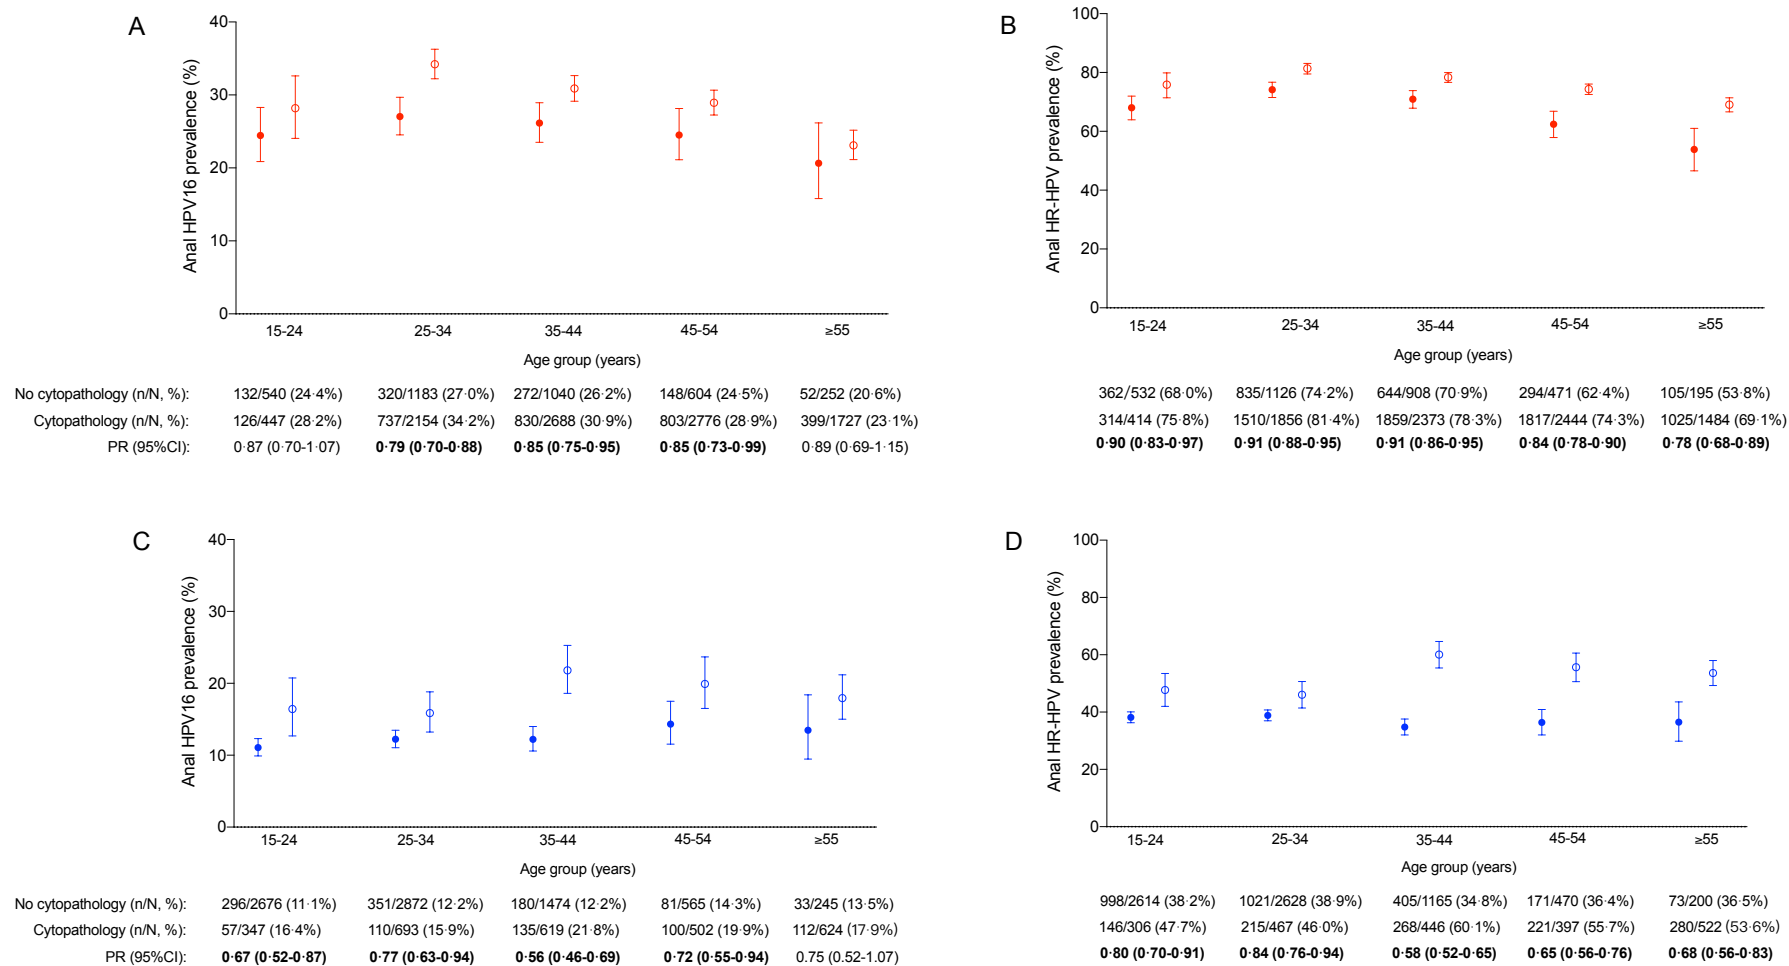

**Appendix Figure 6: Prevalence of anal histological HSIL+ in studies that performed HRA in all participants.** Error bars show 95% CIs. HPV=human papillomavirus. HSIL+=high-grade squamous intraepithelial lesions and worse. MSM=men who have sex with men. These studies are ranked in descending order of HSIL+ prevalence in HIV-positive MSM. \*Only includes participants with HSIL+ plus HPV16-positive swabs.

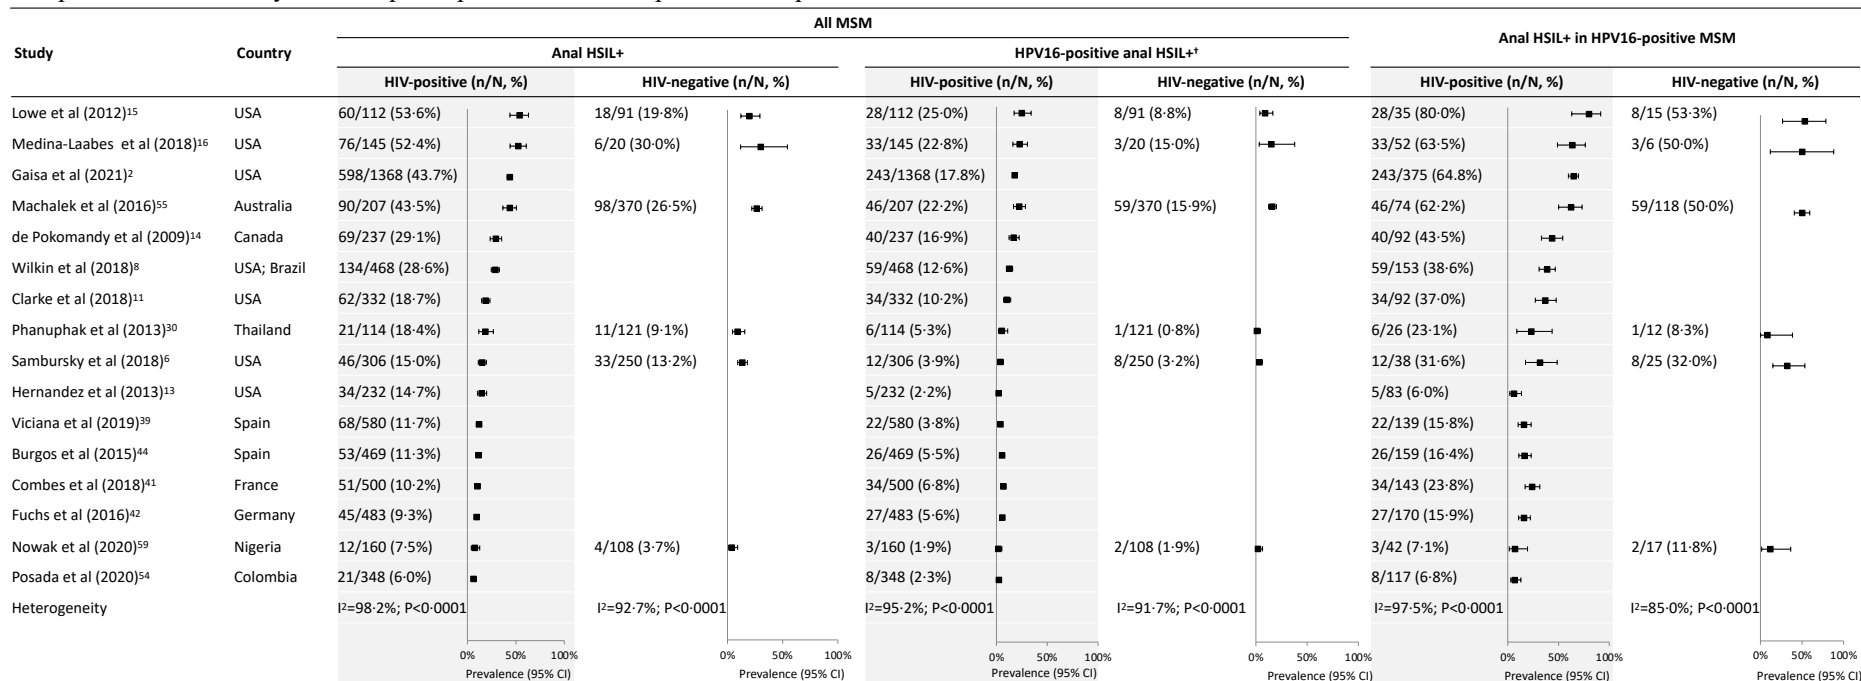

**Appendix Figure 7: Prevalence of anal HPV16 and anal HSIL+ in HIV-positive MSM, according to current CD4+ cell count, stratified by age group.** Error bars show 95% CIs. PRs were adjusted for study. HPV=human papillomavirus. HIV+=HIV positive. HSIL+=high-grade squamous intraepithelial lesions and worse. MSM=men who have sex with men. aPR=aadjusted prevalence ratio. Significant aPRs relative to the reference group are shown in bold. \*Only includes participants with HSIL+ plus HPV16-positive swabs. Note: The points (with 95% CIs) and aPRs (with 95% CIs) are not shown if the denominators were below 20.

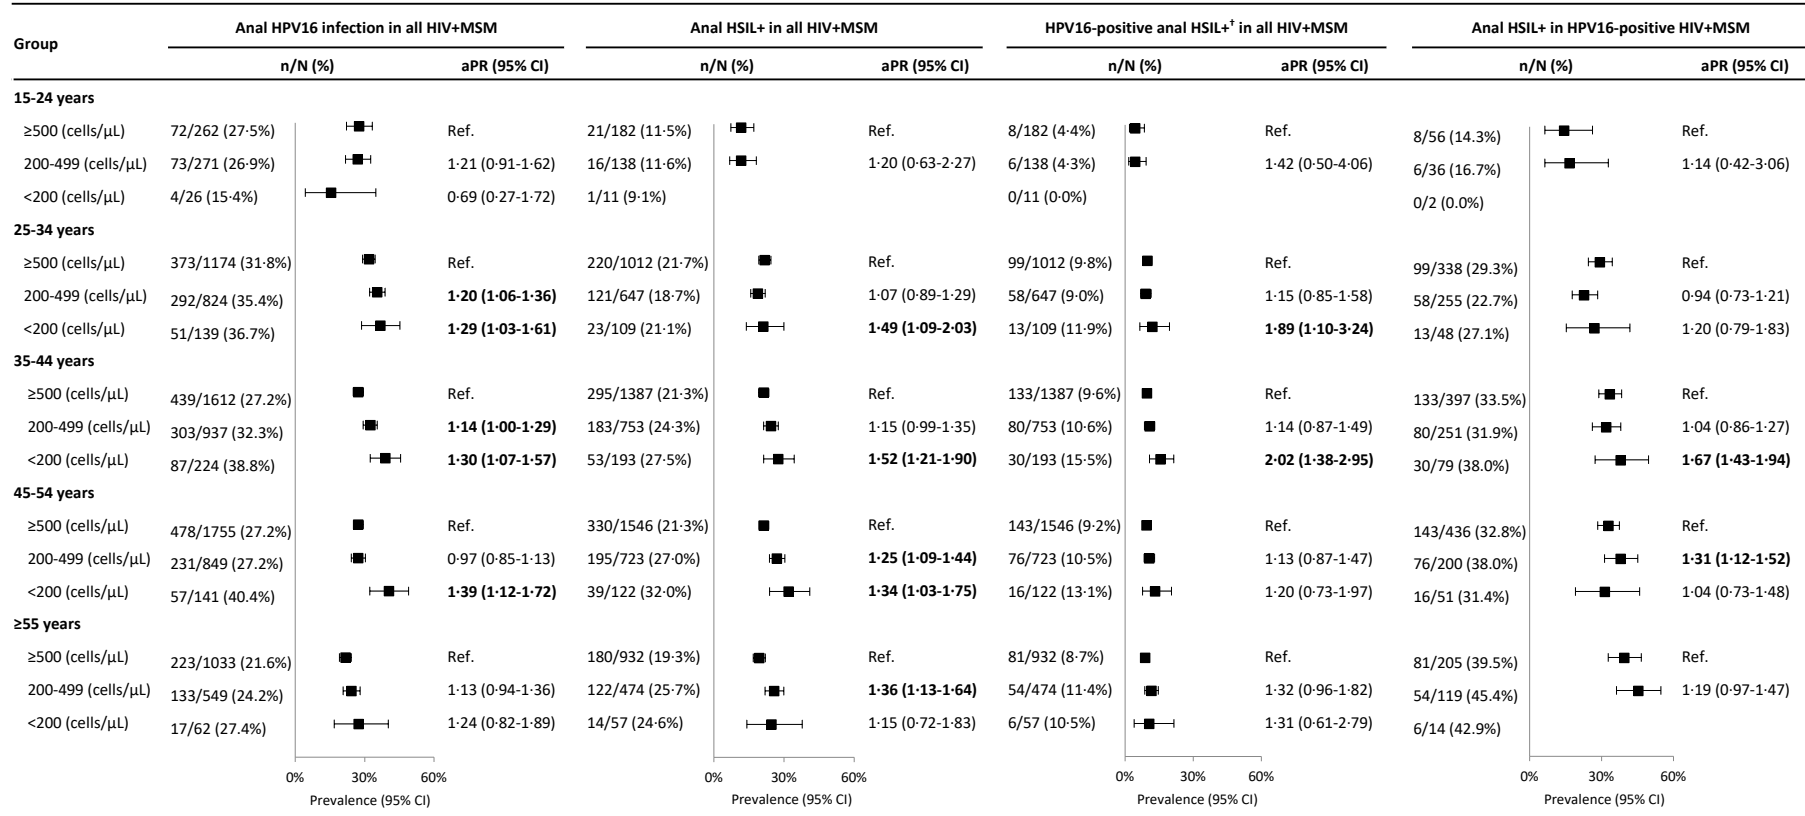

**Appendix Figure 8: Prevalence of anal HPV16 in HIV-positive MSW, according to current CD4+ cell count, nadir CD4+ cell count, and HIV viral load.** Error bars show 95% CIs. PRs were adjusted for age group and study. HPV=human papillomavirus. MSW=men who have sex with women. aPR=adjusted prevalence ratio.

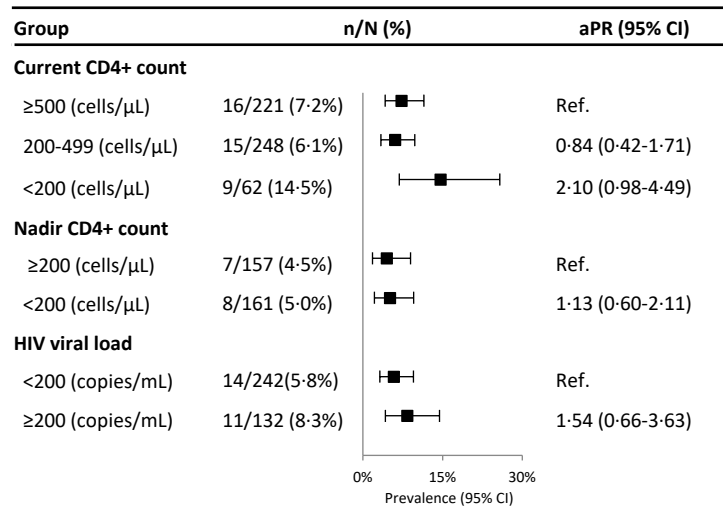



## References

1. D'Souza G, Wentz A, Wiley D, et al. Anal Cancer Screening in Men Who Have Sex With Men in the Multicenter AIDS Cohort Study. *J Acquir Immune Defic Syndr* 2016; **71**(5): 570-6.
2. Gaisa MM, Sigel KM, Deshmukh AA, et al. Comparing Anal Cancer Screening Algorithms Using Cytology and HPV DNA Testing in Three High-risk Populations. *J Infect Dis* 2021.
3. Chin-Hong PV, Vittinghoff E, Cranston RD, et al. Age-Specific prevalence of anal human papillomavirus infection in HIV-negative sexually active men who have sex with men: the EXPLORE study. *J Infect Dis* 2004; **190**(12): 2070-6.
4. Meites E, Gorbach PM, Gratz B, et al. Monitoring for Human Papillomavirus Vaccine Impact Among Gay, Bisexual, and Other Men Who Have Sex With Men-United States, 2012-2014. *J Infect Dis* 2016; **214**(5): 689-96.
5. Critchlow CW, Hawes SE, Kuypers JM, et al. Effect of HIV infection on the natural history of anal human papillomavirus infection. *AIDS* 1998; **12**(10): 1177-84.
6. Sambursky JA, Terlizzi JP, Goldstone SE. Testing for Human Papillomavirus Strains 16 and 18 Helps Predict the Presence of Anal High-Grade Squamous Intraepithelial Lesions. *Dis Colon Rectum* 2018; **61**(12): 1364-71.
7. Sudenga SL, Nyitray AG, Torres BN, et al. Comparison of anal HPV natural history among men by country of residence: Brazil, Mexico, and the United States. *J Infect* 2017; **75**(1): 35-47.
8. Wilkin TJ, Chen H, Cespedes MS, et al. A Randomized, Placebo-Controlled Trial of the Quadrivalent Human Papillomavirus Vaccine in Human Immunodeficiency Virus-Infected Adults Aged 27 Years or Older: AIDS Clinical Trials Group Protocol A5298. *Clin Infect Dis* 2018; **67**(9): 1339-46.
9. Nyitray A, Nielson CM, Harris RB, et al. Prevalence of and risk factors for anal human papillomavirus infection in heterosexual men. *J Infect Dis* 2008; **197**(12): 1676-84.
10. Choi Y, Loutfy M, Remis RS, et al. HPV genotyping and risk factors for anal high-risk HPV infection in men who have sex with men from Toronto, Canada. *Sci rep* 2021; **11**(1): 4779.
11. Clarke MA, Cheung LC, Lorey T, et al. Five-year prospective evaluation of cytology, HPV testing, and biomarkers for detection of anal precancer in HIV+ MSM. *Clin Infect Dis* 2018; **69**(4): 631-8.
12. Hood JE, Gottlieb GS, Kiviat NB, et al. The association between HPV, intraepithelial lesions and HIV-1 shedding in anogenital specimens in two contrasting populations: Senegalese women and American MSM. *Int J STD AIDS* 2016; **27**(5): 353-62.
13. Hernandez AL, Efird JT, Holly EA, Berry JM, Jay N, Palefsky JM. Risk factors for anal human papillomavirus infection type 16 among HIV-positive men who have sex with men in San Francisco. *J Acquir Immune Defic Syndr* 2013; **63**(4): 532-9.
14. de Pokomandy A, Rouleau D, Ghattas G, et al. Prevalence, clearance, and incidence of anal human papillomavirus infection in HIV-infected men: the HIPVIRG cohort study. *J Infect Dis* 2009; **199**(7): 965-73.
15. Lowe B, Goldstone SE, Rus S, et al. Detection of human papillomavirus in anal specimens using the hybrid capture 2 assay. *Diagn Mol Pathol* 2012; **21**(3): 150-6.
16. Medina-Laabes DT, Ortiza AP, Guiot HM, et al. Association between human papillomavirus infection and anal intraepithelial neoplasia in a clinic-based sample of HIV-positive adults in Puerto Rico. *J Low Genit Tract Dis* 2018; **22**(4):320-5.
17. Nyitray AG, Fujimoto K, Zhao J, Giuliano AR, Schneider JA, Hwang LY. Prevalence of and Risk Factors for Anal Human Papillomavirus Infection in a Sample of Young, Predominantly Black Men Who Have Sex With Men, Houston, Texas. *J Infect Dis* 2017; **217**(5):777-84.
18. Wei F, Li M, Wu X, et al. The prevalence and concordance of human papillomavirus infection in different anogenital sites among men and women in Liuzhou, China: A population-based study. *Int J Cancer* 2018; **142**(6): 1244-51.
19. Tian T, Mijiti P, Bingxue H, et al. Prevalence and risk factors of anal human papillomavirus infection among HIV-negative men who have sex with men in Urumqi city of Xinjiang Uyghur Autonomous Region, China. *PLoS One* 2017; **12**(11): e0187928.
20. Li X, Li M, Yang Y, et al. Anal HPV/HIV co-infection among Men Who Have Sex with Men: a cross-sectional survey from three cities in China. *Sci Rep* 2016; **6**: 21368.
21. Gao L, Zhou F, Li X, Yang Y, Ruan Y, Jin Q. Anal HPV infection in HIV-positive men who have sex with men from China. *PLoS One* 2010; **5**(12): e15256.
22. Cheng SH, Wang CC, Chang SL, Chu FY, Hsueh YM. Oncogenic human papillomavirus is not helpful for cytology screening of the precursor lesions of anal cancers in Taiwanese men who are infected with human immunodeficiency virus. *Int J Clin Oncol* 2015; **20**(5): 943-51.
23. Hu Y, Qian HZ, Sun J, et al. Anal human papillomavirus infection among HIV-infected and uninfected men who have sex with men in Beijing, China. *J Acquir Immune Defic Syndr* 2013; **64**(1): 103-14.
24. Cranston RD, Althouse AD, van Griensven F, et al. Prevalence of Anal Human Papillomavirus Vaccine Types in the Bangkok Men Who Have Sex With Men Cohort Study. *Sex Transm Dis* 2015; **42**(12): 671-6.
25. Khoo SP, Shafii MKA, Bhoo-Pathy N, et al. Prevalence and sociodemographic correlates of anogenital Human Papillomavirus (HPV) carriage in a cross-sectional, multi-ethnic, community-based Asian male population. *PLoS One* 2021; **16**(1): e0245731.
26. Wang CC, Chang SL, Chu FY, Cheng CY, Cheng SH. Human papillomavirus infection and anal cytology in Taiwanese homosexual men with and without HIV infection. *J Infect Dev Ctries* 2019; **13**(4): 318-25.
27. Hernandez AL, Karthik R, Sivasubramanian M, et al. Prevalence of Anal HPV Infection Among HIV-Positive Men Who Have Sex With Men in India. *J Acquir Immune Defic Syndr* 2016; **71**(4):437-43.
28. Liu X, Lin H, Chen X, et al. Prevalence and genotypes of anal human papillomavirus infection among HIV-positive vs. HIV-negative men in Taizhou, China. *Epidemiol Infect* 2019; **147**:e117.

29. Strong C, Zou H, Ko NY, Liang YL, Ku WW, Lee CW. Prevalence and risk factors of anogenital human papillomavirus infection in a community sample of men who have sex with men in Taiwan: baseline findings from a cohort study. *Sex Transm Infect* 2020; **96**(1):62-6.
30. Phanuphak N, Teeratakulpisarn N, Keelawat S, et al. Use of human papillomavirus DNA, E6/E7 mRNA, and p16 immunocytochemistry to detect and predict anal high-grade squamous intraepithelial lesions in HIV-positive and HIV-negative men who have sex with men. *PLoS One* 2013; **11**(8): e78291.
31. Yuniastuti E, Teeratakulpisarn N, Jeo WS, et al. Incidence, clearance, persistence and factors related with high-risk anal HPV persistence in South-East Asian MSM and transgender women. *AIDS* 2020; **34**(13): 1933-41.
32. Li Z, Zhang H, Li X, et al. Anal Human Papillomavirus Genotyping among HIV-Positive Men Who Have Sex with Men in Xi'an, China. *PLoS One* 2015; **10**(4): e0125120.
33. Ruanpeng D, Chariyalertsak S, Kaewpoowat Q, et al. Cytological Anal Squamous Intraepithelial Lesions Associated with Anal High-Risk Human Papillomavirus Infections among Men Who Have Sex with Men in Northern Thailand. *PLoS One* 2016; **11**(5): e0156280.
34. Wittawatmongkol O, Gatechompol S, Kerr SJ, et al. Human papillomavirus infection among male adolescents and young adults with perinatally-acquired HIV and without HIV in Thailand. *Int J STD AIDS* 2019; **30**(10): 960-8.
35. Yang Y, Li X, Zhang Z, et al. Association of human papillomavirus infection and abnormal anal cytology among HIV-infected MSM in Beijing, China. *PLoS One* 2012; **7**(4): e35983.
36. Leng CY, Low HC, Chua LL, et al. Human papillomavirus 16 (HPV16) and HPV52 E6-specific immunity in HIV-infected adults on combination antiretroviral therapy. *HIV Med* 2017; **18**(5):321-31.
37. van Aar F, Mooij SH, van der Sande MA, et al. Anal and penile high-risk human papillomavirus prevalence in HIV-negative and HIV-infected MSM. *AIDS* 2013; **27**(18): 2921-3.
38. Dona MG, Latini A, Benevolo M, Moretto D, Cristaudo A, Giuliani M. Anal human papillomavirus infection prevalence in men who have sex with men is age-independent: a role for recent sexual behavior? *Future Microbiol* 2014; **9**(7): 837-44.
39. Viciana P, Milanes-Guisado Y, Fontillon M, et al. High-risk Human Papilloma Virus Testing Improves Diagnostic Performance to Predict Moderate- to High-grade Anal Intraepithelial Neoplasia in Human Immunodeficiency Virus-infected Men Who Have Sex With Men in Low-to-Absent Cytological Abnormalities. *Clin Infect Dis* 2019; **69**(12): 2185-92.
40. Torres M, Gonzalez C, del Romero J, et al. Anal human papillomavirus genotype distribution in HIV-infected men who have sex with men by geographical origin, age, and cytological status in a Spanish cohort. *J Clin Microbiol* 2013; **51**(11): 3512-20.
41. Combes JD, Heard I, Poizot-Martin I, et al. Prevalence and Risk Factors for Anal Human Papillomavirus Infection in Human Immunodeficiency Virus-Positive Men Who Have Sex with Men. *J Infect Dis* 2018; **217**(10): 1535-43.
42. Fuchs W, Kreuter A, Hellmich M, et al. Asymptomatic anal sexually transmitted infections in HIV-positive men attending anal cancer screening. *Br J Dermatol* 2016; **174**(4): 831-8.
43. Smelov V, Elfstrom KM, Eklund C, Sokolova O, Dillner J. Determinants of the presence of human papillomaviruses in the anal canal of Russian men. *J Med Virol* 2018; **90**(10): 1643-50.
44. Burgos J, Curran A, Tallada N, et al. Risk of progression to high-grade anal intraepithelial neoplasia in HIV-infected MSM. *AIDS* 2015; **29**(6): 695-702.
45. Iribarren Diaz M, Ocampo Hermida A, Gonzalez-Carrero Fojon J, et al. Preliminary results of a screening program for anal cancer and its precursors for HIV-infected men who have sex with men in Vigo-Spain. *Rev Esp Enferm Dig* 2017; **109**(4): 242-9.
46. Woestenberg PJ, van Benthem BHB, Bogaards JA, et al. HPV infections among young MSM visiting sexual health centers in the Netherlands: Opportunities for targeted HPV vaccination. *Vaccine* 2020; **38**(17): 3321-9.
47. Hidalgo-Tenorio C, Gil-Anguita C, Lopez Ruz MA, Omar M, Lopez-Hidalgo J, Pasquau J. ART is key to clearing oncogenic HPV genotypes (HR-HPV) in anal mucosa of HIV-positive MSM. *PLoS One* 2019; **14**(10): e0224183.
48. Schofield AM, Sadler L, Nelson L, et al. A prospective study of anal cancer screening in HIV-positive and negative MSM. *AIDS* 2016; **30**(9): 1375-83.
49. Tsikis S, Hoefler L, Bethimoutis G, et al. Risk factors, prevalence, and site concordance of human papillomavirus in high-risk Greek men. *Eur J Cancer Prev* 2018; **27**(5): 514-20.
50. Pernot S, Boucheron P, Pere H, et al. Comparison of anal cancer screening strategies including standard anoscopy, anal cytology, and HPV genotyping in HIV-positive men who have sex with men. *Br J Cancer* 2018; **119**(3): 381-6.
51. Del Pino M, Marti C, Gaber J, et al. mRNA Detection in Anal Cytology: A Feasible Approach for Anal Cancer Screening in Men Who Have Sex with Men Living With HIV. *Diagnostics* 2019; **9**(4): 173.
52. Etienney I, Vuong S, Si-Mohamed A, Flejou JF, Atienza P, Bauer P. Value of cytologic Papanicolaou smears and polymerase chain reaction screening for human papillomavirus DNA in detecting anal intraepithelial neoplasia: comparison with histology of a surgical sample. *Cancer* 2012; **118**(24): 6031-8.
53. Damay A, Fabre J, Costes V, et al. Human papillomavirus (HPV) prevalence and type distribution, and HPV-associated cytological abnormalities in anal specimens from men infected with HIV who have sex with men. *J Med Virol* 2010; **82**(4): 592-6.
54. Posada DH, Acevedo LST, Arredondo MV, Vasquez GIS. High-risk human papillomavirus infection and associated factors in the anal canal of HIV-positive patients in Medellin, 2017-2018. *Rev Saude Publica* 2020; **54**: 93.
55. Machalek DA, Poynten IM, Jin F, et al. A Composite Cytology-Histology Endpoint Allows a More Accurate Estimate of Anal High-Grade Squamous Intraepithelial Lesion Prevalence. *Cancer Epidemiol Biomarkers Prev* 2016; **25**(7): 1134-43.
56. Chow EPF, Danielewski JA, Murray GL, et al. Anal human papillomavirus infections in young unvaccinated men who have sex with men attending a sexual health clinic for HPV vaccination in Melbourne, Australia. *Vaccine* 2019; **37**(43): 6271-5.

57. Ong JJ, Walker S, Grulich A, et al. Incidence, Clearance and Persistence of Anal HPV in Men who Have Sex with Men Living with HIV: Implications for HPV Vaccination. *Sex Transm Dis* 2019; **46**(4): 229-33.
58. Zou H, Tabrizi SN, Grulich AE, et al. Site-specific human papillomavirus infection in adolescent men who have sex with men (HYPER): an observational cohort study. *Lancet Infect Dis* 2014; **15**(1): 65-73.
59. Nowak RG, Schumaker LM, Ambulos NP, et al. Multiple HPV infections among men who have sex with men engaged in anal cancer screening in Abuja, Nigeria. *Papillomavirus Res* 2020; **10**: 100200.
60. Murenzi G, Kim HY, Munyaneza A, et al. Anogenital Human Papillomavirus and HIV Infection in Rwandan Men Who Have Sex With Men. *J Acquir Immune Defic Syndr* 2020; **84**(5): 463-9.
61. Chikandiwa A, Chimoyi L, Pisa PT, et al. Prevalence of anogenital HPV infection, related disease and risk factors among HIV-infected men in inner-city Johannesburg, South Africa: baseline findings from a cohort study. *BMC Public Health* 2017; **17**(S3): 425.
62. Ferre VM, Gbeasor-Komlanvi FA, Collin G, et al. Prevalence of Human Papillomavirus, Human Immunodeficiency Virus, and Other Sexually Transmitted Infections Among Men Who Have Sex With Men in Togo: A National Cross-sectional Survey. *Clin Infect Dis* 2019; **69**(6): 1019-1026.
63. Chinyowa S, Palefsky JM, Chirenje ZM, Makunike-Mutasa R, Munjoma M, Muguti GI. Anal human papillomavirus infection in HIV-positive men and women at two opportunistic infections clinics in Harare, Zimbabwe. *BMC Public Health* 2018; **18**(1): 1260.
64. Mboumba Bouassa RS, Mbeko Simaleko M, Camengo SP, et al. Unusual and unique distribution of anal high-risk human papillomavirus (HR-HPV) among men who have sex with men living in the Central African Republic. *PLoS One* 2018; **13**(5): e0197845.
